# Supplementary material for: Increasing and widespread vulnerability of intact tropical rainforests to repeated droughts
Source: PubMed Central journal article supplement — Proc Natl Acad Sci U S A. 2022 Sep 6;119(37):e2116626119. doi: 10.1073/pnas.2116626119 (PMC9477241; doi:10.1073/pnas.2116626119), 2022-09-06
Supplement: pnas.2116626119.sapp.pdf [file pnas.2116626119.sapp.pdf]

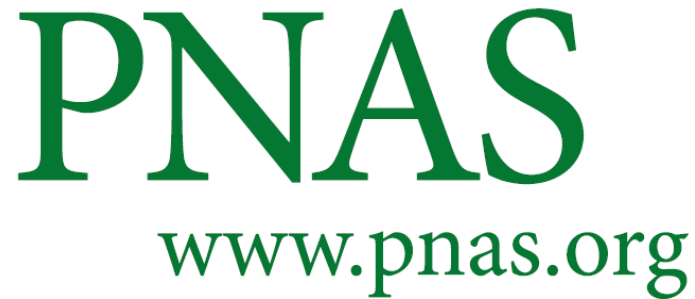

## **Supplementary Information for**

### **Increasing and widespread vulnerability of intact tropical rainforests to repeated droughts**

Shengli Tao\*, Jérôme Chave\*, Pierre-Louis Frison, Thuy Le Toan, Philippe Ciais, Jingyun Fang, Jean-Pierre Wigneron, Maurizio Santoro, Hui Yang, Xiaojun Li, Nicolas Labrière, Sassan Saatchi

\*Correspondence to: [sltao@pku.edu.cn](mailto:sltao@pku.edu.cn); [jerome.chave@univ-tlse3.fr](mailto:jerome.chave@univ-tlse3.fr)

#### **This PDF file includes:**

SI Materials and Methods

1. [Microwave signal in ecological monitoring](#)
2. [Satellite radar data and pre-processing](#)
3. [Exploring alternative microwave data sets](#)
4. [Definition of intact tropical rainforest](#)
5. [Scaling radar time series](#)
6. [Harmonising radar data](#)

7. Validation of the time series construction method
8. Influence of spatial autocorrelation on the significance of signal trends
9. Definition of past droughts
10. Trend analysis of forest response
11. Drought resistance and resilience of intact tropical rainforests
12. Interpreting the long-term radar signal declines: Sensitivity of C-band radar data to forest degradation/deforestation
13. Interpreting the long-term radar signal declines: Sensitivity of C-band radar data to soil moisture
14. Interpreting the long-term radar signal declines: Influence of heavy rain events
15. Interpreting the long-term radar signal declines: Shifts in dry season length
16. Interpreting the long-term radar signal declines: Influences of leaf surface water
17. Interpreting the long-term radar signal declines: Forest biomass changes

SI References

Figures. S1-S31

# 1 **SI Materials and Methods**

## 2 1. Microwave signal in ecological monitoring

3 Microwaves are electromagnetic waves with wavelengths ranging from ~1 mm to ~1 m (1).  
4 There are generally two types of microwave sensors: passive (radiometer) and active (radar).  
5 Since objects much smaller than the wavelength are invisible to microwaves, the microwave  
6 signal can penetrate surfaces (such as the forest canopy) to some extent, with the penetration  
7 depth increasing with increasing wavelength. Microwaves are not affected by clouds and  
8 raindrops over tropical rainforests, given a wavelength much larger than the size of raindrops,  
9 such as ~6 cm (or, C-band radio frequency; 1). Microwave data, especially those with a  
10 relatively long wavelength, are therefore suitable for monitoring changes in tropical forests.  
11 The spaceborne radar sensors used in this study are Earth-pointing active microwave  
12 instruments that transmit pulses of microwave radiation and record the signal backscattered  
13 from the Earth's surface along the line of sight of the instrument (1, 2). The signal intensity  
14 measured by active sensors is higher than that of passive sensors, the latter measuring the  
15 microwave signal naturally emitted by the Earth's surface.

16 When microwave signals interact with canopies, the amount of water molecules  
17 contained in the leaves and branches, i.e., their dielectric properties, affects the backscattered  
18 signals. This amount of water is the total mass of water in the leaves and branches, which  
19 depends on the density of leaves and branches (i.e., dry biomass) and their water content  
20 (mass of water per unit mass of dry biomass) (1, 3). Thus, whether the temporal changes in  
21 microwave signals reflect dynamics of canopy structure or tissue moisture dynamics requires  
22 careful interpretation. On diurnal and seasonal time scales, it can be assumed that the change  
23 in canopy structure is small, and the dynamics of microwave signal represents the change in  
24 forest moisture (3). Over many years, in addition to moisture, changes in canopy structure  
25 could explain long-term trends in the microwave signal (3) caused by the mixed effects of  
26 forest growth, mortality, and possibly also long-term changes in forest species composition.  
27 Sections 12-17 below further explore the influence of various factors on the radar signal.

28

## 29 2. Satellite radar data and pre-processing

30 The backscatter of the radar signal, usually expressed in decibels (dB), is a function of the  
31 sensor parameters (frequency, polarization, look angle and spatial resolution), and the  
32 dielectric (as detailed above) and geometric properties of the scattering objects. Spaceborne

33 radars used for Earth observation currently operate in a wavelength ( $\lambda$ ) range between  $\sim 1$  cm  
34 and 23 cm. Future radar sensors will operate with a wavelength of  $\sim 70$  cm (4). For a forest,  
35 radar waves at  $\lambda \approx 6$  cm (C-band) interact with leaves, twigs, and small branches thereby  
36 penetrating the top few meters of the canopy (5), whereas at  $\lambda \approx 70$  cm the waves interact  
37 with larger branches and trunks and can reach the forest floor (1).

38 Satellite-based active microwave sensors include Synthetic Aperture Radar (SAR) which  
39 maps the backscattered signal into high spatial resolution images, and scatterometers which  
40 provide data at footprints with a coarser spatial resolution ( $> 1$  km), but with a much higher  
41 revisit rate. This last property makes scatterometers interesting for the study of large-scale  
42 land surface dynamics. Spaceborne radar sensors have been deployed since 1978 (NASA's  
43 Seasat), but global radar coverage dates back to the European Remote Sensing satellite (ERS)  
44 in the 1990s (5-8). Over the last three decades, multiple missions have been launched with  
45 the aim of obtaining full and repeated global coverage (9, 10).

46 For this study, we considered the contribution of all data sets acquired by satellites flying  
47 a radar instrument, with repeated observations over at least one decade and with a wavelength  
48 longer than 1 cm to avoid issues related to cloud cover and rainfall. Scatterometer data from  
49 the European Remote sensing Satellite (ERS) -1/-2 operating at  $\lambda \approx 6$  cm wavelength (C-  
50 band, from 1992 to 2001), the Advanced Scatterometer (ASCAT, C-band, from 2007 to  
51 2018), and the Quik Scatterometer (QSCAT, operating at Ku-band, i.e.,  $\lambda \approx 2$  cm, from 1999  
52 to 2009) were our primary candidates. In addition, we considered the use of data acquired by  
53 the ERS Synthetic Aperture Radar (SAR) (C-band, 1992 to 2011), the Advanced Synthetic  
54 Aperture Radar (ASAR, C-band, 2002 to 2012), Oceansat-2 Scatterometer (OSCAT, Ku-  
55 band, since 2009), the Radarsat-1 and -2 SAR (C-band, 1995–now), and the Sentinel-1A and  
56 -1B SAR (C-band, since 2014).

57 We found that data from the following four scatterometers together provided the longest  
58 time series of 27 years, namely ERS-1/-2 scatterometers (1992–2001, C-band), QSCAT  
59 (1999–2009, Ku-band), and ASCAT (2007–2018, C-band). A single time series at C-band  
60 would have been ideal, but reduced operations of the ERS-2 scatterometers began in 2001  
61 (11). We therefore sought to fill the gap in the C-band data with Ku-band QSCAT data. In  
62 theory, the Ku-band signal interacts more with the smaller vegetation elements in the upper  
63 canopy layer (e.g., leaves) than the C-band signal, as the latter penetrates deeper into the  
64 canopy (1). However, we found that the Ku-band QSCAT signal can be adjusted to the ERS

65 observations during 1999–2001 and to the ASCAT observations during 2007–2009 to obtain  
66 a simulated C-band signal (see sections 5 & 6 for more details). We didn't use the Ku-band  
67 OSCAT as it operates in an overlapping period with ASCAT but has a shorter wavelength.

68 ERS-1/-2 scatterometer data were downloaded from the European Organisation for the  
69 Exploitation of Meteorological Satellites (EUMETSAT) while QSCAT (H-Polarization) and  
70 ASCAT (V-Polarization) data were available from the Center for Remote sensing at Brigham  
71 Young University (BYU). The latter provides images synthesised from acquisitions made  
72 over periods of five consecutive days. Ascending path images were used for QSCAT and  
73 ASCAT, and all path images for ERS-1/-2, thus guaranteeing the highest possible spatial and  
74 temporal coverages. Descending path ASCAT images and V-Polarization QSCAT images  
75 gave similar decreasing trends in radar signal. Since the radar backscattered signal was  
76 acquired under different look geometries, we normalized the observations to a common 40-  
77 degree incidence angle to be free of angle influence on the observations (5). The radar  
78 observations were averaged into monthly layers with a global coverage at a spatial resolution  
79 of  $25 \times 25$  km. Some ASCAT images were characterized by regions with a low number of  
80 radar observations (Fig. S31a). These locations were set to “not-a-number” after thresholding  
81 for a minimum number of observations, which was set to 20. A few ERS images had large  
82 areas of data gaps and were removed from our data set (Fig. S31b). The ERS-2 sensor  
83 experienced a sensor drift of 0.2 dB from July 1996 to June 1997 in our study region (12),  
84 which was corrected during our processing.

85

### 86 3. Exploring alternative microwave data sets

87 To complement the scatterometer data sets and, possibly, fill gaps in space and in time, we  
88 also explored archives of other satellite observations at C-band. However, the ERS-1/-2 SAR  
89 and the Radarsat-1/2 SAR did not achieve complete and repeated coverage throughout their  
90 missions (11). The ASAR data sets were more homogeneous in space and time but lacked  
91 observations for tropical Asia between 2002 and 2010, and were in general poorly calibrated.  
92 Because of the temporally dense set of observations by ASCAT, the contribution of Sentinel-  
93 1 SAR data was not considered. The deficiencies of the SAR data sets here explored forced  
94 us to conclude that these could not act as an effective complement to the scatterometer data  
95 sets.

96 A further investigation was undertaken to see if passive microwave data could fill the  
97 data gap. C-band passive microwave data from the AMSR-E sensor operated between 2002  
98 and 2011 (13), thus not overlapping with ERS. Data from another C-band passive microwave  
99 sensor, AMSR2, are available since 2012 and do not overlap with AMSR-E (13). AMSR-E  
100 and AMSR2 also provide passive microwave data at X-band (10.6 GHz) but merging them  
101 has been proven as difficult (14) because of the disconnection between the two sensors.  
102 Passive microwave data at even higher frequencies (such as Ku-band, 12.5 GHz) covered a  
103 relatively long timespan (13, 15, 16) but can be sensitive to atmospheric corrections. We  
104 therefore decided not to use passive microwave data in our analysis.

105

#### 106 4. Definition of intact tropical rainforest

107 We restricted our analyses to the intact evergreen tropical rainforests. First, we defined  
108 evergreen tropical rainforests using the 2015 Climate Change Initiative (CCI) land-cover  
109 map, with a spatial resolution of 300 metres. A 25 km radar pixel was labelled as evergreen if  
110 more than 50% of the CCI land-cover pixels were evergreen forest (classes labeled as: 50,  
111 160, 170 in the data set). To avoid confounding effects of land-use changes, we then defined  
112 intact tropical rainforests using the recently published 2020 baseline map of undisturbed  
113 tropical forests by Vancutsem et al. (17, 30 m resolution). Vancutsem et al. mapped  
114 deforestation and degradation events between 1990 and 2019 through combining big data  
115 information extraction and visual analytics aided by expert knowledge. The 2020 baseline  
116 map of undisturbed tropical forest contains the pixels fully covered with forests and have  
117 never been deforested or degraded during 1990-2019. A 25 km radar pixel was classified as  
118 intact tropical rainforest if the proportion of the 30 m undisturbed rainforest pixels within it  
119 was at least 95%. This filtering resulted in approximately 3800 pixels (about 2.4 million km<sup>2</sup>)  
120 in the American tropics, 1100 (about 0.7 million km<sup>2</sup>) in Africa and 430 (about 0.3 million  
121 km<sup>2</sup>) in Asia.

122

#### 123 5. Scaling radar time series

124 We developed a two-step approach to harmonise C-band (ERS-1/-2 and ASCAT) and Ku-  
125 band (QSCAT) data into a continuous long-term radar data set. The first step was to produce  
126 uniform ranges of backscatter values from different sensors (i.e., data scaling). The second

127 step was to harmonise the scaled data into a smooth time series by processing their monthly  
128 differences, as follows.

129 We used the linear scaling method for rescaling time series. The linear scaling method  
130 involves first scaling a time series within the range of the reference time series, and then  
131 applying a linear regression equation between the two to minimise errors. We chose ASCAT  
132 as the baseline for the scaling because it has the best radiometric quality (lower sensitivity,  
133 higher radiometric resolution), and because it is still operational. The scaling procedure was  
134 performed pixel by pixel at a monthly time step. Specifically, a linear regression was  
135 established for each pixel using QSCAT and ASCAT data in the overlapping periods in  
136 2007–2009, which we then applied to the entire time series of QSCAT data. Thereafter, the  
137 ERS data were mean-shifted to match the QSCAT-ASCAT time series (18). The ERS-1 and  
138 ERS-2 data sets were already calibrated, so there was no need to rescale them separately.  
139 Figure S27 shows an example of data scaling, where radar data from different sensors have  
140 been successfully unified into one scale.

141

## 142 6. Harmonising radar data

143 The scaled radar data were then harmonised into a smooth time series. Differences were  
144 found between C-band and scaled Ku-band signals, despite similar interannual variations  
145 (Fig. S28). It is important to note that the differences showed a seasonal pattern. During dry  
146 periods, Ku-band radar signals were higher than C-band, but in the wet periods they were  
147 lower (19, 20). The differences were most evident in regions with higher annual precipitation  
148 (Fig. S28). To account for the seasonality of the signal, we investigated the role of rainfall  
149 amount as a predictor. We calculated the monthly differences of C-band minus Ku-band  
150 signals during the overlapping periods (Fig. S29a). We then regressed the signal differences  
151 against monthly precipitation measured by the TRMM (Tropical Rainfall Measurement  
152 Mission) 3B43 V7 data (Fig. S29b; 21) and predicted the signal differences. CHIRPS rainfall  
153 data was also tested, and highly similar results were obtained (Fig. S29d-f). Finally, we added  
154 the predicted differences to the original Ku-band signals (Fig. S29c). This procedure resulted  
155 in a much-improved match between C-band and Ku-band signals. Some poor-quality pixels  
156 (less than 10%) were concentrated in northwest Amazonia and the Asian tropics, where  
157 precipitation has no clear seasonality and signal differences consequently showed no clear  
158 temporal pattern (Fig. S30a). We therefore used the Decision Tree regression to capture the

159 non-linear relationship between signal differences and precipitation (22), and this improved  
160 the goodness of match in these pixels (Fig. S30, d & e). Quality assessment indicates a global  
161 median  $r$  value of 0.62 between C-band and corrected Ku-band signals in the overlapping  
162 years (1999-2001 and 2007-2009). For the pixels where Decision Tree regression was used to  
163 model the signal differences, their final median  $r$  value is 0.61.

164 Lastly, the regression (linear or decision tree) between the signal differences and  
165 precipitation, established with data from the overlapping periods, was applied on TRMM  
166 precipitation data from 1999 to 2009, and the predicted signal differences were added to the  
167 full QSCAT time series. The data merging procedure was applied pixel by pixel. After  
168 transforming the QSCAT data, we built a time series for each pixel for the 1992–2018 period,  
169 averaging data from the overlapping periods (1999–2001 and 2007–2009).

170

## 171 7. Validation of the time series construction method

172 From January 2001 to 2011, the ERS-2 satellite experienced a series of failures that affected  
173 data continuity and global coverage. However, observations were occasionally available over  
174 some tropical regions (11), which allowed us to test whether the scaled Ku-band (QSCAT)  
175 signal is consistent with the C-band signal. We used the European Space Agency (ESA)  
176 reprocessed ERS-2 data set covering the period of 1996–2011  
177 ([https://earth.esa.int/web/guest/missions/esa-operational-eo-missions/ers/news/-/article/ers-2-](https://earth.esa.int/web/guest/missions/esa-operational-eo-missions/ers/news/-/article/ers-2-scatterometer-l2-dataset-processing-with-asps-v-10-04-completed)  
178 [scatterometer-l2-dataset-processing-with-asps-v-10-04-completed](https://earth.esa.int/web/guest/missions/esa-operational-eo-missions/ers/news/-/article/ers-2-scatterometer-l2-dataset-processing-with-asps-v-10-04-completed)). Part of the American and  
179 Asian tropics were covered by this ERS-2-ESA data set, and we compared it to our merged  
180 radar data set in these two regions. Monthly radar backscatter coefficients at 40-degree  
181 incidence angle were calculated from the ERS-2-ESA data set, and compared with our  
182 merged radar data set. Both in tropical Americas and Asia, we found similar backscatter  
183 dynamics between ERS-2-ESA and our merged data (Pearson  $r \geq 0.88$ , Fig. S3), validating  
184 our data merging approach.

185 We also compared the radar signal over different land-cover types where its seasonal  
186 amplitude is expected to be very different. We confirmed that the backscatter signal was  
187 lower in shrubland, savanna and deciduous forest than in evergreen rainforest, and that, as  
188 expected, the drier biome types displayed a higher seasonality than the evergreen forests (Fig.  
189 S2).

190



## 191 8. Influence of spatial autocorrelation on the significance of signal trends

192 The decreasing trends in radar signal shown in Fig. 1 were averaged across pixels per  
193 continent. However, we expect radar signals to be correlated from pixel to pixel. This could  
194 imply a spatial pseudo-replication in some of the trend analyses: trend results may appear  
195 falsely significant because of an over-inflated sample size. We thus tested whether the  
196 decreasing radar trends are robust to spatial autocorrelation.

197 We used the following approach:

- 198 1. randomly select  $N$  pixel pairs in each continent, each pair containing two pixels with  
199 a distance  $D$  of 0.25 (in degree unit, the size of radar pixel).  $N$  was set at 1/10 of the  
200 total number of pixel pairs with a distance  $D$ .
- 201 2. calculate the Pearson  $r$  between pairs of radar time series, and then average  $r$  across  
202 all pairs. Repeat these two steps 500 times, and take the mean values.
- 203 3. vary  $D$  by increments of 0.25 degrees, and record the  $D$  values and mean  $r$  values.
- 204 4. plot the mean  $r$  values against  $D$  values, to identify the geographical distance ( $D_2$ )  
205 corresponding to a mean Pearson  $r$  of 0.5.

206 Once the spatial autocorrelation  $D_2$  was known, we selected a subset of pixels at least  $D_2$   
207 apart (15, 24, and 52 pixels in tropical Americas, Africa, and Asia, respectively), and  
208 recalculated the average radar signal trend over this reduced sample. This reanalysis resulted  
209 in very similar results for the signal trends calculated as average across all pixels and those  
210 averaged across the reduced sample of pixels (Pearson  $r \geq 0.92$ , Fig. S6). This result confirms  
211 that the significant decreasing trend in radar signal found in this study is not caused by  
212 autocorrelation.

213

## 214 9. Definition of past droughts

215 Quantifying drought events across regions is difficult (23), especially in tropical rainforests  
216 where climate stations are scarce. The cumulative water deficit (CWD) is a useful metric for  
217 defining droughts in the tropics (23, 24). CWD was calculated at a monthly time-step as the  
218 cumulative difference between precipitation ( $P$ ) and evapotranspiration ( $E$ ). The cumulative  
219 water deficit (CWD) is always negative or equal to zero, and is defined as:

220  $if \quad CWD_{n-1}-E+P < 0$   
 221  $then \quad CWD_n = CWD_{n-1} - E + P$   
 222  $else \quad CWD_n = 0$

223 Precipitation  $P$  was taken from the CHIRPS data (25) because TRMM was unavailable  
 224 between 1992 and 1998. The CHIRPS data set was created by integrating satellite  
 225 observation with *in situ* rain gauge data (25). During the period 1998–2018, the CHIRPS  
 226 precipitation product was similar to the TRMM product, but the former was extended through  
 227 the period 1992–2018 in our analysis. Previous research has assumed a monthly value of 100  
 228 mm for tropical rainforest evapotranspiration,  $E$  (24). Here, to better accounts for soil and  
 229 atmosphere water stresses across regions, we used an improved version of CWD, with  $E$   
 230 taken from the long-term Global Land Evaporation Amsterdam Model (GLEAM) product,  
 231 version 3.3a (<https://www.gleam.eu/>) (26; Fig. S4).

232 To identify past drought events, we then computed the standardized anomaly (or Z-score)  
 233 of the maximum  $CWD$  in a year ( $Z_{MCWD,y}$ ):

$$234 \quad Z_{MCWD,y} = \frac{\max_y(CWD) - \overline{\max_{refer}(CWD)}}{\sigma_{\max_{refer}(CWD)}}$$

235 where  $\max_y(CWD)$  is the maximum of the cumulative water deficit in year  $y$ ,  
 236  $\overline{\max_{refer}(CWD)}$  is the average of  $\max(CWD)$  during a reference period, and  $\sigma_{\max_{refer}(CWD)}$   
 237 is the standard deviation of  $\max(CWD)$  during the same reference period. The reference  
 238 period covers all the years excepted the year under study (27). The calculation was performed  
 239 at pixel level and for each year of the period 1992-2018. A threshold of -1 on  $Z_{MCWD,y}$  was  
 240 then used to decide whether a pixel was exposed to an anomalous drought in year  $y$ . The  
 241 drought severity was finally calculated as the absolute value of  $Z_{MCWD,y}$ .

242

## 243 10. Trend analysis of forest response

244 The temporal radar signals were averaged over continental pixels (Fig. 1). To clearly show  
 245 the long-term changes in radar signal, a 12-month moving average was calculated (thick lines  
 246 in Fig. 1). Annual rates of radar signal change were then calculated as the slopes of the linear  
 247 fits to monthly radar signals (equations labelled in Fig. 1). The linear fit was also applied at  
 248 the pixel level to obtain the annual rate of radar signal change of each pixel (Fig. 2).

249 The BFAST (Breaks For Additive Season and Trend) algorithm was then used to  
 250 check whether drought events had caused “breaks” in radar time series (Fig. S5). BFAST  
 251 detects “breaks” in a time series by fitting piecewise linear models iteratively to different  
 252 sections of the time series (28). Correlations between radar time series and water deficit were  
 253 then calculated at pixel level (Fig. S8). We also explored the dependence on land surface  
 254 temperature ( $T_s$ ) as both water deficit and ( $T_s$ ) could force vegetation stress (29). Diurnal ( $T_s$ )  
 255 data were extracted from the MODIS database from 2002 to 2018. We also correlated the  
 256 radar signal with air temperature (ERA5-Land; DOI: 10.24381/cds.68d2bb30; 30).

257

## 258 11. Drought resistance and resilience of intact tropical rainforests

259 Previous research has attempted to detect early-warning signals in non-linear systems,  
 260 including with remotely sensed data (31, 32). Considering that meteorological conditions  
 261 changes from year to year, here we used short-term forest resilience and resistance to clearly  
 262 see the response of forests to each drought event. Drought resistance and resilience were  
 263 defined, respectively, as:

$$264 \quad \text{resistance} = \frac{Y_e - Y_{pre}}{Y_{pre}}$$

$$265 \quad \text{resilience} = \frac{Y_{post} - Y_{pre}}{Y_{pre}}$$

266 Where  $Y_e$  is the minimum radar data during a drought event, i.e., the extent of radar signal  
 267 reduction during a drought, and  $Y_{pre}$  and  $Y_{post}$  are the maximum radar values before and after a  
 268 drought event, respectively. These definitions are directly inspired by Lloret et al (33).

269 For each forest pixel, we detected drought events in that pixel based on the basis of the  
 270 standardized anomaly (Z-score) of MCWD. As described above, a pixel was considered to  
 271 have experienced a drought in a year if the Z-score of MCWD reached a value lower than -1,  
 272 and drought severity was calculated as the absolute value of the Z-score of MCWD. For the  
 273 year in which a drought occurred, we then identified the month when drought intensity  
 274 reached its maximum.  $Y_e$  was then calculated by looking for the minimum radar value within  
 275 a three-month range centred on the month when drought intensity reached its maximum,  
 276 considering that there might be a time-lag between a drought and forest response.  $Y_{pre}$  was  
 277 calculated as the maximum radar value within the two years prior to the drought, and  $Y_{post}$   
 278 was calculated as the maximum radar values in the two years after the event, because

279 previous research has reported a drought legacy effect of two years in rainforests (34). This  
280 also avoids the situation where the year prior to the drought was also droughted, thus leading  
281 to an overestimation of drought resilience. We used radar signal maxima before and after the  
282 drought because they correspond to wet-season conditions, and thus have comparable  
283 moisture levels, their difference (namely, resilience) thus measures forest structure changes  
284 from canopy disturbance, rather than moisture changes.

285 The amplitudes of the radar signal vary across regions, and we therefore also rescaled the  
286 radar time series to fall into the range 1-100 for each pixel before calculating the resistance  
287 and resilience indices. By definition, resistance and resilience could not be calculated for the  
288 droughts occurring in the first (1992) and the last year (2018) of the study period. In the  
289 tropical Americas, only six months in the year of 1998 had qualifying radar observations,  
290 hence we did not calculate drought resistance and resilience in 1998 for the tropical  
291 Americas. Resistance and resilience associated with all other drought events were calculated  
292 at the pixel scale, and were further summarized in continents (Figs. 3 & 4).

293 The Mann-Kendall trend test, a classical nonparametric test for identifying trends in time  
294 series data, was used to check whether there are significant trends in the drought  
295 resistance/resilience time series (Figs. 3 & 4; 35). Kendall's tau, or  $\tau$ , indicates whether a  
296 trend exists. The value of  $\tau$  ranges from -1 (negative trend) to 1 (positive trend). A trend is  
297 considered strong if the absolute value of  $\tau$  is close to 1. The significance of the trend was  
298 judged by a two-sided P value. We used the R package 'Kendall' for Mann-Kendall test  
299 (<https://cran.r-project.org/web/packages/Kendall/index.html>). As the Mann-Kendall test has a  
300 requirement on the length of the input time series that cannot be satisfied at the pixel level,  
301 we used Spearman's rho (SR) test (36) to check the temporal changes in resistance/resilience  
302 in pixels where more than two droughts occurred during the study period (Fig. S16).  
303 Spearman's rho test is a rank-based method widely used for trend analysis, and its value also  
304 ranges from -1 (strong negative trend) to 1 (strong positive trend). We used Matlab R2018 to  
305 evaluate Spearman's rho test.

306 We checked that our conclusion was not altered by the use of a longer drought legacy  
307 window, a lower threshold for Z-score of MCWD, a constant evapotranspiration of 100 mm  
308 per month (24), and detrended radar signals (Figs. S10-S13). The results of these sensitivity  
309 tests consistently indicated an increasing vulnerability of intact rainforests to drought,  
310 especially in the tropical Americas. The conclusion was also verified when the monthly CRU  
311 Self-calibrating Palmer Drought Severity Index (scPDSI) was used instead of the Z-score of

312 MCWD to identify past drought events (Fig. S14; 37). A threshold of -1 was applied on  
313 scPDSI to define droughts, and the absolute value of the minimum scPDSI value during  
314 droughted months was used as a quantification of drought severity.

315

## 316 12. Interpreting the long-term radar signal declines: Sensitivity of C-band radar data to forest 317 degradation/deforestation

318 We found sustained declining trends in radar signal over the past decades in all three  
319 continents. To interpret the sustained declines in radar signal, we analysed possible drivers of  
320 radar signal change. We first assessed the sensitivity of C-band radar data to forest  
321 degradation/deforestation, using three approaches.

322 In the first approach, we grouped the intact tropical rainforest radar pixels into  
323 different categories of forest degradation or deforestation intensities, namely less than 1%, 1-  
324 2%, 2-3% and 3-5% (cumulative degradation/deforestation ratio between 1992 and 2018).  
325 The degradation/deforestation information were derived from the Vancutsem et al. maps (17).  
326 If degradation or deforestation had contributed to the radar signal trend, we would expect a  
327 steeper slope in the 3-5% class than in the <1% class. However, we found that the radar  
328 anomaly showed a similar decline in all four classes of degradation/deforestation in tropical  
329 Americas. In tropical Africa and Asia, pixels with a 3-5% degradation/deforestation ratio  
330 even showed less severe declines in radar anomaly than in the <1% class (Fig. S19). This  
331 shows that the long-term decline in radar signal was not driven by the small fraction (<5%) of  
332 degradation/deforestation within the intact rainforest radar pixels.

333 Secondly, we used pixels with an increasing trend in radar signal as a test set, in  
334 tropical Americas and Africa. Too few pixels showed an increasing trend in radar signal in  
335 tropical Asia, so this continent was not included in the analysis. One possible hypothesis is  
336 that the pixels with an increasing trend in radar signal cover the true intact tropical forests,  
337 and that all other forests are exposed to some form of deforestation or degradation explaining  
338 the decline in radar signal. Using Vancutsem et al.'s maps (17), we explored the temporal  
339 dynamics of degradation/deforestation intensity for pixels with decreasing radar trends, and  
340 we compared these with the degradation/deforestation intensity in pixels with increasing  
341 radar trends. We found no difference in the pattern of degradation/deforestation intensity in  
342 the two groups of pixels (Fig. S7). In contrast, water stress explained the differences: the  
343 pixels with an increasing radar signal trend experienced much less severe water deficit during

344 2005-2014, which corresponds to the period when one time series declined while the other  
345 remained relatively stable (Fig. S7). This phenomenon was observed in both tropical  
346 Americas and Africa. The results are therefore consistent with the hypothesis that droughts  
347 rather than degradation/deforestation dominate changes in the radar signal.

348 Lastly, we verified that other masks of intact tropical rainforest did not alter the  
349 findings. We used Hansen et al's (38) forest change maps between 2000 and 2018 and the  
350 Forest Integrity Index (FII) map which reflects the state of global forests for the year of 2019  
351 (39). Using the forest-cover and annual degradation/deforestation maps from Hansen et al.  
352 (38, 30 m resolution), we created an intact rainforest mask at 25 km resolution as follows: all  
353 30 m pixels were classified as intact tropical rainforest if they had >90% forest cover in 2000  
354 and did not show any sign of deforestation from 2000 to 2018; a 25 km radar pixel was then  
355 classified as intact rainforest if the proportion of 30 m intact rainforest pixels within it was at  
356 least 90%. Using the Forest Integrity Index (FII, ~300 m resolution; 39), we created a mask at  
357 25 km resolution by selecting the radar pixels in which at least 90% of the FII pixels have a  
358 high integrity index (>9.6 as defined in ref 39). We reached the same conclusion of a decline  
359 in radar signal irrespective of the selected mask (Fig. S20), confirming that the result is  
360 neither sensitive to the mask used to define intact tropical rainforests nor to the extent of  
361 residual degradation/deforestation found in radar pixels defined as "intact".

362

### 363 13. Interpreting the long-term radar signal declines: Sensitivity of C-band radar data to soil 364 moisture

365 We tested whether the radar signal contained mainly canopy backscatter information, and that  
366 contributions from the ground through canopy gaps represented a minor fraction. To this end,  
367 we compared our radar data with the L-band time series ( $\lambda \approx 20$  cm) of brightness  
368 temperatures from the Soil Moisture and Ocean Salinity (SMOS) radiometer. SMOS  
369 brightness temperature is more sensitive to soil moisture than C-band scatterometer signals  
370 (40). We used a "worst-case" scenario in which a severe flood occurred under a forest in  
371 southwestern Amazonia near the Beni savannas in Bolivia. As expected, the SMOS  
372 brightness temperature dropped suddenly during the flood, but C-band signal showed no  
373 abrupt change (Fig. S22), suggesting that the contribution of soil moisture to the C-band radar  
374 backscatter is negligible over dense tropical forests.

375

376 14. Interpreting the long-term radar signal declines: Influence of heavy rain events

377 Heavy rain (e.g., due to local thunderstorm) could reduce the backscatter by a few dB at C-  
378 band. However, heavy rain is often localized, thus its impact should become less severe at the  
379 scale of 25 km. Besides, the impact of heavy rain on radar signal is usually short, causing  
380 drops in radar backscatter that last less than a few days. Since we averaged the radar data into  
381 monthly composites, the effect of heavy rain on the radar signal used in our study is  
382 negligible.

383 To quantitatively assess the influence of heavy rain on radar signal, we calculated the  
384 temporal trends in rain rate (>5 mm/hour) observed at the time of the QSCAT acquisition  
385 (6:00 am of each day in 1999-2009) and ASCAT acquisition (21:30 pm of each day in 2007-  
386 2018), using TRMM 3B42 3-Hourly rainfall data (41). We found that globally 56% and 62%  
387 of intact rainforests showed decreasing trends in rain rate (>5 mm/hour) when QSCAT and  
388 ASCAT observations were acquired, respectively (Fig. S18). The spatial pattern contrasts  
389 with the observed widespread decline in radar signals. Thus, we concluded that the heavy rain  
390 events should not be responsible for the long-term radar signal decreases.

391

392 15. Interpreting the long-term radar signal declines: Shifts in dry season length

393 Previous research has detected a significant increase in dry season length in the rainforests of  
394 southern Amazonia (42) and Central Africa (43), and this could be a potential driver of the  
395 long-term radar signal change. We calculated the duration of the dry season using  
396 precipitation data from the GPCC (44; available until 2016), to be consistent with Jiang et al.  
397 (43). Mean yearly radar signal was correlated with dry season length between 1992 and 2016  
398 in southern Amazonia but the relationships were mainly caused by extreme drought events  
399 (Fig. S21c). Thus, the effect of increase in dry season length on radar signal changes is  
400 insignificant.

401

402 16. Interpreting the long-term radar signal declines: Influences of leaf surface water

403 Leaf water is a key component of the canopy water content and has been reported to  
404 influence microwave signal. The influence was found to be most pronounced at the diurnal  
405 time scale (45). To clarify the role of leaf water changes on radar signal trends, we explored  
406 the long-term dynamics in leaf surface water (LWs, including dew and intercepted rainfall)  
407 and leaf internal water (LWi) —two components of leaf water content.

408 First, we tested whether the radar signal decreases reflect reduction in LWs. Both  
409 dynamics in dew duration and intercepted rainfall were explored. Intercepted rainfall  
410 correlates with monthly rainfall amount. Monthly dew duration was calculated as the  
411 percentage of hours within a month when air temperature is lower than dew-point  
412 temperature, with dew point temperature and air temperature provided by the ERA5 hourly  
413 climate data set. We found no evidence for a significant decrease in rainfall amount or dew  
414 duration except in Africa (Fig. S23). We noted that the temporal dynamics in dew duration in  
415 African rainforests did not coincide with the radar signal trend: the latter showed a sustained  
416 decline after 2004/2005 while dew duration increased during this period.

417 Second, we explored whether the decline in radar signal is driven by a decline in leaf  
418 internal water (LWi). Plant physiology constrains the moisture of a leaf: even small moisture  
419 loss within the leaf creates a loss of turgor and eventually leaf abscission (45, 46). Thus, LWi  
420 should not vary with time except for through changes in leaf amount (loss or gains of leaves).  
421 As a result, LWi changes can be indicated by changes in forest leaf amount. We used  
422 Normalized Difference Vegetation Index (NDVI) and Leaf Area Index (LAI) to explore the  
423 long-term changes in leaf amount in our study area. Since it is challenging to draw inferences  
424 from optical remote sensing images over tropical rainforests, we used four sets of NDVI/LAI  
425 products, including the Global Inventory Monitoring and Modeling System (GIMMS) third  
426 generation NDVI (available between 1981 and 2015; 47, 48), GIMMS LAI3g (available  
427 between 1981 and 2016; 49), GLOBMAP LAI (available between 1981 and 2020; 50) and  
428 Moderate Resolution Imaging Spectroradiometer (MODIS) LAI (available since 2000). For  
429 GIMMS LAI and NDVI, we used the quality flag embedded in the data to include only the  
430 high-quality observations in the data analyses. MODIS LAI was also quality-controlled as in  
431 ref (51). We failed to detect trends in NDVI in all three continents. Regarding LAI, the three  
432 sets of LAI products differed in temporal dynamics, but they showed no sign of significantly  
433 sustained decrease since 1992 (Fig. S24). In Africa and Asia, GIMMS LAI decreased after  
434 2010, but this temporal trajectory did not match with radar signal changes in Africa and Asia.  
435 More specifically, GIMMS LAI increased around 2004/2005 in Africa when radar signal  
436 started to decrease continuously (Fig. S24). GIMMS LAI was stable between 2000 and 2010  
437 in Asia but radar signal decreased continuously during the same period.

438 Based on the above analyses, we concluded that neither leaf surface water nor leaf  
439 internal water are the drivers of the long-term declining radar signal trends.

440



441 17. Interpreting the long-term radar signal declines: Forest biomass changes

442 In addition to forest water stress, drought can also cause forest structure and biomass changes  
443 through, for example, drought-induced defoliation, branch fall, or tree mortality (34, 52, 53),  
444 thus influencing forest radar signals at the inter-annual or even longer time scales. We  
445 therefore also explored whether the long-term radar signal declines could correspond to  
446 drought-induced forest biomass changes. We first compared the radar signal trends with two  
447 long time series of forest aboveground biomass carbon data sets from Liu et al. (54) and Xu  
448 et al. (55), for the American tropics. The time series of forest carbon of Liu et al. was created  
449 mainly using Ku-band (19.3 GHz) and X-band (10.7 GHz) Vegetation Optical Depth (VOD)  
450 data. The Xu product was created using extensive forest inventory and multiply remote  
451 sensing data such as airborne laser scanning, satellite lidar measurements of vegetation  
452 height, and time series of microwave images. Our radar signal showed similar temporal  
453 trends with the two forest carbon time series (Fig. S25). The Pearson  $r$  value between the  
454 yearly radar signal and Xu carbon density is 0.86. The Pearson  $r$  value between the yearly  
455 radar signal and Liu carbon density is 0.84 (Fig. S25).

456 We then conducted a stricter comparison. We compared changes in the radar signal with  
457 plot biomass changes caused by the Amazon droughts of 2005 and 2010. For the 2005  
458 drought, 55 RAINFOR plots with a median size of ca. 1 ha were censused before and after  
459 the drought (23), some in the same radar pixel. During the censuses, all trees  $\geq 10$  cm trunk  
460 diameter were measured, and new individuals were tagged and identified taxonomically. The  
461 census periods of plots varied: the median start date of the 2005 census periods of all plots  
462 was June 2004, and median end date was April 2006, with a variation of  $\sim 5$  months in both  
463 cases. Therefore, to match these census periods, we used the maximum monthly radar value  
464 within a 5-month window centered at June 2004 (i.e., from April to August 2004) as the  
465 starting radar value, and the maximum value during February–June 2006 as the ending value.  
466 As with the calculation of the resistance/resilience index, the aim of using the maxima of the  
467 radar signal is to minimize the influence of moisture level variations on the trends in radar  
468 signal.

469 For the 2010 event, a total of 97 plots across Amazonia were available (56), also with a  
470 median size of ca. 1 ha. Changes in plot biomass caused by the 2010 drought were calculated  
471 as the anomalies with respect to a baseline average for 1998–2010 (56). This calculation can  
472 be readily applied to radar signals without the necessity of controlling for inter-census  
473 duration as for the 2005 plot data. Thus, we expect the comparison with the 2010 drought

474 ground data to be more reliable. We calculated the radar anomalies for the 2010 event the  
475 same way as Feldpausch et al. (56) calculated the biomass anomalies. For both drought  
476 events, plot data within the same radar pixel were averaged, and radar signals were smoothed  
477 using a moving window of 3 months to improve robustness. Regression analyses were then  
478 conducted using the standard major axis (SMA) regression implemented in the R package  
479 “smatr” (57).

480       Significantly positive relationships between radar signal and plot biomass changes were  
481 observed (Fig. S26a & b), although the R-squared values were low. As an attempt to address  
482 the mismatch of scales between radar data (25 x 25 km) and plot data (1 ha), we included  
483 only radar pixels with at least two ground plots, with inter-plot distance at least 5 km or 10  
484 km (Fig. S26c & d). From this analysis, we concluded that although the radar signal measures  
485 changes in the upper canopy, it not only captures drought-induced water stress but also  
486 rainforest biomass dynamics at the inter-annual time scale.

## References

1. Ulaby, F. T., Moore, R. K., Fung, A. K. Microwave Remote Sensing: Active and Passive. Addison Wesley, Advanced Book Program: Reading, Massachusetts (1982).
2. Steele-Dunne, S. C. *et al.*, Radar remote sensing of agricultural canopies: A review. *IEEE J-STARS* **10**, 2249–2273 (2017).
3. Konings, A. G., Rao, K., Steele-Dunne, S. C. Macro to micro: microwave remote sensing of plant water content for physiology and ecology. *New Phytol.* **223**, 1166–1172 (2019).
4. Le Toan, T. *et al.*, The BIOMASS mission: Mapping global forest biomass to better understand the terrestrial carbon cycle. *Remote Sens. Environ.* **115**, 2850–2860 (2011).
5. Frison, P. L., Mougin, E. Use of ERS-1 wind scatterometer data over land surfaces *IEEE Trans. Geosci. Remote Sens.* **34**, 550–560 (1996).
6. Wagner, W., Lemoine, G., Borgeaud, M., Rott, H. A Study of Vegetation Cover Effects on ERS Scatterometer Data. *IEEE Trans. Geosci. Remote Sens.* **37**, 938–948 (1999a).
7. Wagner, W., Noll, J., Borgeaud, M., Rott, H. Monitoring soil moisture over the Canadian Prairies with the ERS scatterometer. *IEEE Trans. Geosci. Remote Sens.* **37**, 206–216 (1999b).
8. Prigent, C., Matthews, E., Aires, F., Rossow, W. B. Remote sensing of global wetland dynamics with multiple satellite data sets. *Geophys. Res. Lett.* **28**, 4631–4634 (2001).
9. Wagner, W. *et al.*, Temporal stability of soil moisture and radar backscatter observed by the Advanced Synthetic Aperture Radar (ASAR). *Sensors* **8**, 1174–1197 (2008).
10. Malenovský, Z. *et al.*, Sentinels for science: Potential of Sentinel-1, -2, and-3 missions for scientific observations of ocean, cryosphere, and land. *Remote Sens. Environ.* **120**, 91–101 (2012).
11. Crapolicchio, R. *et al.*, ERS-2 scatterometer: Mission performances and current reprocessing achievements. *IEEE Trans. Geosci. Remote Sens.* **50**, 2427–2448 (2012).
12. Lecomte, P., Wagner, W. ERS wind scatterometer commissioning & in-flight calibration. European Space Agency-Publications-ESA SP **424**, 261–270 (1998).
13. Moesinger, L. *et al.*, The global long-term microwave Vegetation Optical Depth Climate Archive (VODCA). *Earth Syst. Sci. Data* **12**, 177–177 (2020).
14. Du, J. *et al.*, A global satellite environmental data record derived from AMSR-E and AMSR2 microwave earth observations. *Earth Syst. Sci. Data Discuss.* **9**, 791–808 (2017).

15. Liu, Y. Y. *et al.*, An analysis of spatiotemporal variations of soil and vegetation moisture from a 29-year satellite-derived data set over mainland Australia. *Water Resour. Res.* **45**, w07405 (2009).
16. Liu, Y. Y. *et al.*, Enhanced canopy growth precedes senescence in 2005 and 2010 Amazonian droughts. *Remote Sens. Environ.* **211**, 26–37 (2018).
17. Vancutsem, C. *et al.*, Long-term (1990–2019) monitoring of forest cover changes in the humid tropics. *Sci. Adv.* **7**, eabe1603 (2021).
18. Steele-Dunne, S. C., Friesen, J., Van de Giesen, N. Using diurnal variation in backscatter to detect vegetation water stress. *IEEE Trans. Geosci. Remote Sens.* **50**, 2618–2629 (2012).
19. Guan, K. *et al.*, Seasonal coupling of canopy structure and function in African tropical forests and its environmental controls, *Ecosphere* **4**, 1–21 (2013).
20. Konings, A. G. *et al.*, Active microwave observations of diurnal and seasonal variations of canopy water content across the humid African tropical forests. *Geophys. Res. Lett.* **44**, 2290–2299 (2017).
21. Tropical Rainfall Measuring Mission (TRMM) (2011), TRMM (TMPA/3B43) Rainfall Estimate L3 1 month 0.25 degree x 0.25 degree V7, Greenbelt, MD, Goddard Earth Sciences Data and Information Services Center (GES DISC), Accessed: [5.10. 2019], 10.5067/TRMM/TMPA/MONTH/7
22. Sankaran, M. *et al.*, Determinants of woody cover in African savannas. *Nature* **438**, 846–849 (2005).
23. Phillips, O. L. *et al.*, Drought sensitivity of the Amazon rainforest. *Science* **323**, 1344–1347 (2009).
24. Aragão, L. E. O. *et al.*, Spatial patterns and fire response of recent Amazonian droughts. *Geophys. Res. Lett.* **34**, L07701 (2007).
25. Funk, C. *et al.*, The climate hazards infrared precipitation with stations—a new environmental record for monitoring extremes. *Sci. Data* **2**, 150066 (2015).
26. Martens, B. *et al.*, GLEAM v3: satellite-based land evaporation and root-zone soil moisture. *Geosci. Model Dev.* **10**, 1903–1925 (2017).
27. Saatchi, S. S. *et al.*, Persistent effects of a severe drought on Amazonian forest canopy. *Proc. Natl. Acad. Sci. USA* **110**, 565–570 (2013).
28. Verbesselt, J. *et al.*, Detecting Trend and Seasonal Changes in Satellite Image Time Series. *Remote Sens. Environ* **114**, 106–115 (2010).

29. Wan, Z. New refinements and validation of the MODIS land-surface temperature/emissivity products. *Remote Sens. Environ.* **112**, 59–74 (2008).
30. Muñoz Sabater, J., (2021): ERA5-Land monthly averaged data from 1950 to 1980. Copernicus Climate Change Service (C3S) Climate Data Store (CDS). (Accessed on < 11-11-2021 >), 10.24381/cds.68d2bb3
31. Scheffer, M. *et al.*, Early-warning signals for critical transitions. *Nature* **461**, 53–59 (2009).
32. Verbesselt, J. *et al.*, Remotely sensed resilience of tropical forests. *Nat. Clim. Change* **6**, 1028–1031 (2016).
33. Lloret, F., Keeling, E. G., Sala, A. Components of tree resilience: effects of successive low-growth episodes in old ponderosa pine forests. *Oikos* **120**, 1909–1920 (2011).
34. Phillips, O. L. *et al.*, Drought–mortality relationships for tropical forests. *New Phytol.* **187**, 631–646 (2010).
35. Kendall, M.G. Rank correlation methods, 4th ed. Charles Griffin, London (1975).
36. Lehmann, E. L., Nonparametrics: Statistical Methods Based on Ranks, Holden-Day, San Francisco, California, USA (1975).
37. van der Schrier G, Barichivich J, Briffa KR and Jones PD (2013) A scPDSI-based global data set of dry and wet spells for 1901-2009. *J. Geophys. Res. Atmos.* **118**, 4025-4048 (10.1002/jgrd.50355).
38. Hansen, M. C. *et al.*, High-resolution global maps of 21st-century forest cover change. *Science* **342**, 850–853 (2013).
39. Grantham, H. S. *et al.*, Anthropogenic modification of forests means only 40% of remaining forests have high ecosystem integrity. *Nat. Commun.* **11**, 5978 (2020).
40. Wigneron, J. P. *et al.*, Tropical forests did not recover from the strong 2015–2016 El Niño event. *Sci. Adv.* **6**, eaay4603 (2020).
41. Tropical Rainfall Measuring Mission (TRMM) (2011), TRMM (TMPA) Rainfall Estimate L3 3 hour 0.25 degree x 0.25 degree V7, Greenbelt, MD, Goddard Earth Sciences Data and Information Services Center (GES DISC), Accessed: [15.12. 2021], 10.5067/TRMM/TMPA/3H/7
42. Fu, R. *et al.*, Increased dry-season length over southern Amazonia in recent decades and its implication for future climate projection. *Proc. Natl. Acad. Sci. USA* **110**, 18110–18115 (2013).
43. Jiang, Y. *et al.*, Widespread increase of boreal summer dry season length over the Congo

- rainforest. *Nat. Clim. Change* **9**, 617–622 (2019).
44. Ziese, M. *et al.*, GPCP Full Data Daily Version. 2018 at 1.0°: Daily Land-Surface Precipitation from Rain-Gauges built on GTS-based and Historic Data. (2018). doi: 10.5676/DWD\_GPCP/FD\_D\_V2018\_100.
  45. Xu, X. *et al.*, Leaf surface water, not plant water stress, drives diurnal variation in tropical forest canopy water content. *New Phytol.* **231**,122–136 (2021).
  46. Bartlett, M. K., *et al.*, The correlations and sequence of plant stomatal, hydraulic, and wilting responses to drought. *PNAS* **113**, 13098–13103 (2016).
  47. Tucker, C. J. *et al.*, An extended AVHRR-8km NDVI dataset compatible with MODIS and SPOT vegetation NDVI data. *Int. J. Remote Sens.* **26**, 4485–4498 (2005).
  48. Pinzon, J. E., Tucker, C. J. A Non-Stationary 1981-2012 AVHRR NDVI3g Time Series. *Remote Sens.* **6**, 6929–6960 (2014).
  49. Zhu, Z. *et al.*, Global data sets of vegetation leaf area index (LAI) 3g and fraction of photosynthetically active radiation (FPAR) 3g derived from global inventory modeling and mapping studies (GIMMS) normalized difference vegetation index (NDVI3g) for the period 1981 to 2011. *Remote Sens.* **5**, 927–948 (2013).
  50. Liu, Y., Liu, R., Chen, J. M. Retrospective retrieval of long-term consistent global leaf area index (1981–2011) from combined AVHRR and MODIS data. *J. Geophys. Res. Biogeosci.* **117**, (G4) (2012).
  51. Chen, C. *et al.*, China and India lead in greening of the world through land-use management. *Nat. Sustain.* **2**, 122–129 (2019).
  52. Leitold, V. *et al.*, El Niño drought increased canopy turnover in Amazon forests. *New Phytol.* **219**, 959–971 (2018).
  53. Aleixo, I. *et al.*, Amazonian rainforest tree mortality driven by climate and functional traits. *Nat. Clim. Change* **9**, 384–388 (2019).
  54. Liu, Y. Y. *et al.*, Recent reversal in loss of global terrestrial biomass. *Nat. Clim. Change* **5**, 470–474 (2015).
  55. Xu, L. *et al.*, Changes in global terrestrial live biomass over the 21st century. *Sci. Adv.* **7**, eabe9829 (2021).
  56. Feldpausch, T. R. *et al.*, Amazon forest response to repeated droughts. *Global Biogeochem. Cycles* **30**, 964–982 (2016).

57. Warton, D. I., Duursma, R. A., Falster, D. S., Taskinen, S. smatr 3 - an R package for estimation and inference about allometric lines. *Methods Ecol. Evol.* **3**, 257–259 (2012).

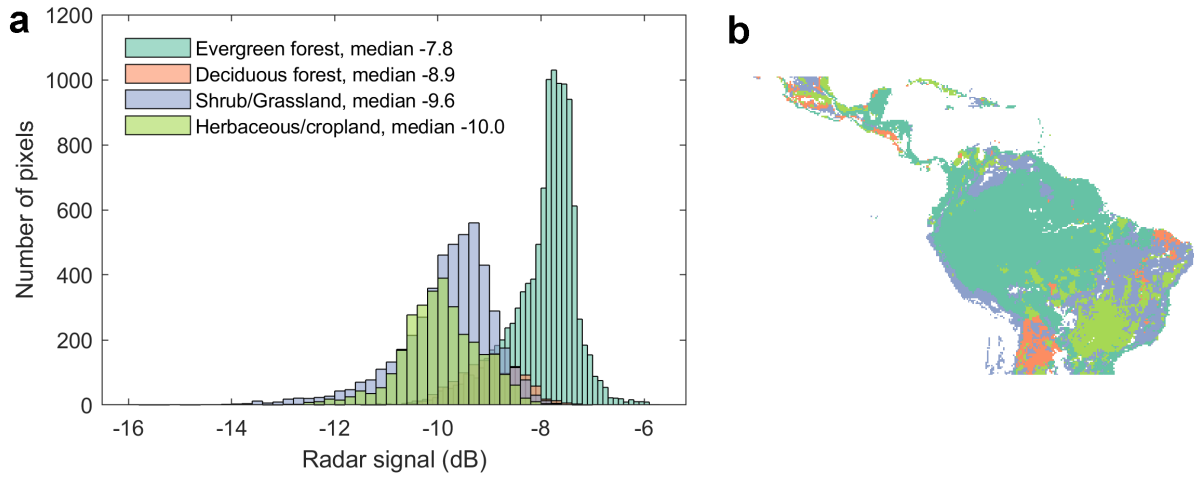

**Fig. S1. (a)** Histograms of the C-band ASCAT signal (in unit of dB, monthly averaged between 2007 and 2018) for four land-cover types in part of the Neotropics. **(b)** shows the spatial distribution of the four types of land-cover. Land cover information was taken from the European Space Agency (ESA) Climate Change Initiative (CCI) land-cover map for the year 2015 ([maps.elie.ucl.ac.be/CCI/viewer/](https://maps.elie.ucl.ac.be/CCI/viewer/)).



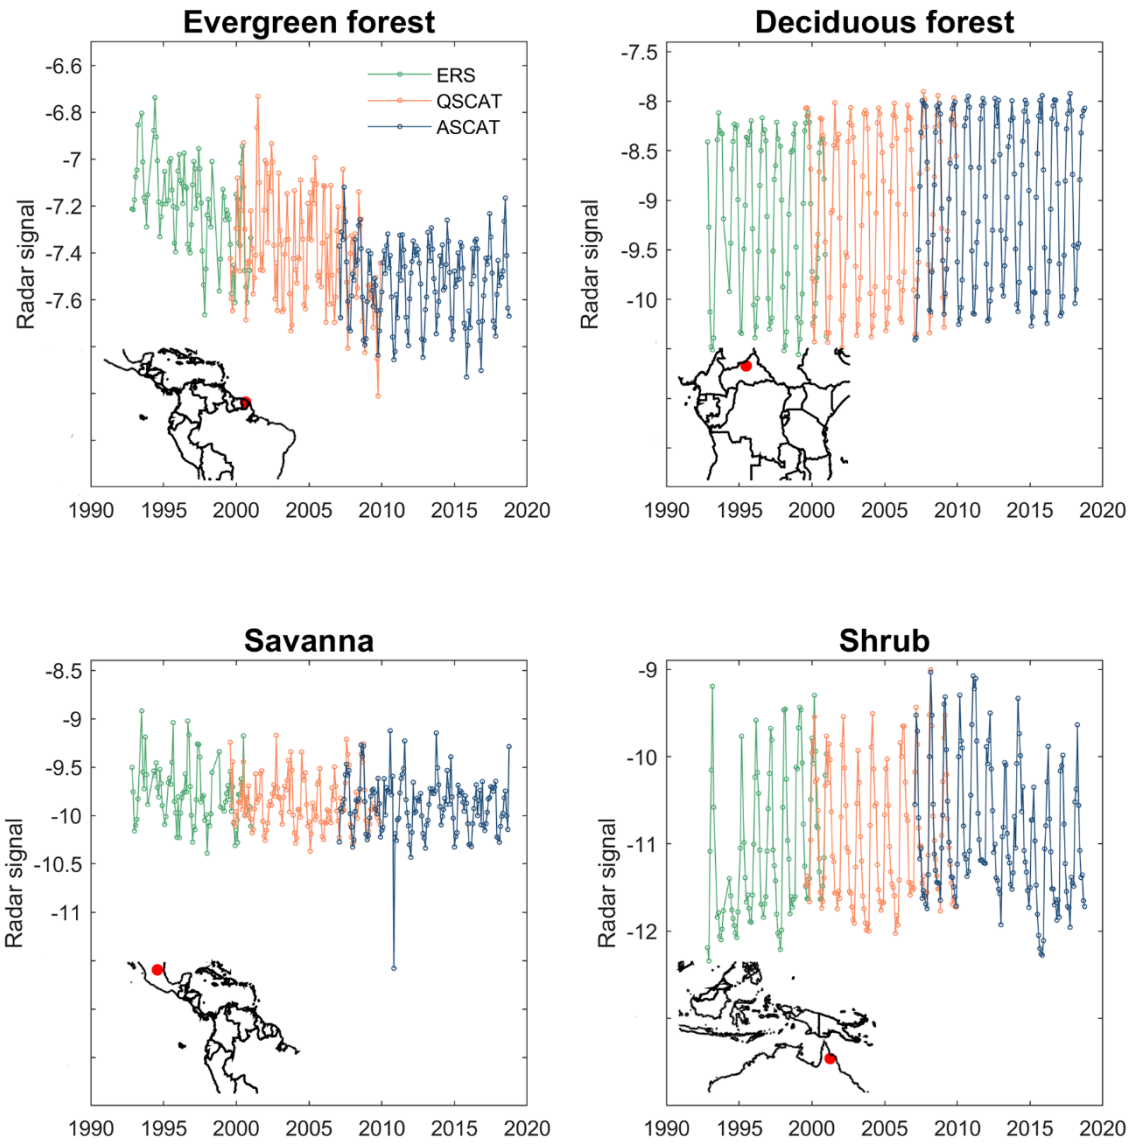

**Fig. S2. Merged radar data in different land-cover types.** Each panel shows the time series of the merged radar signal over one 25 km pixel. The position of the pixel is displayed as a red dot in the lower-left part of each panel.

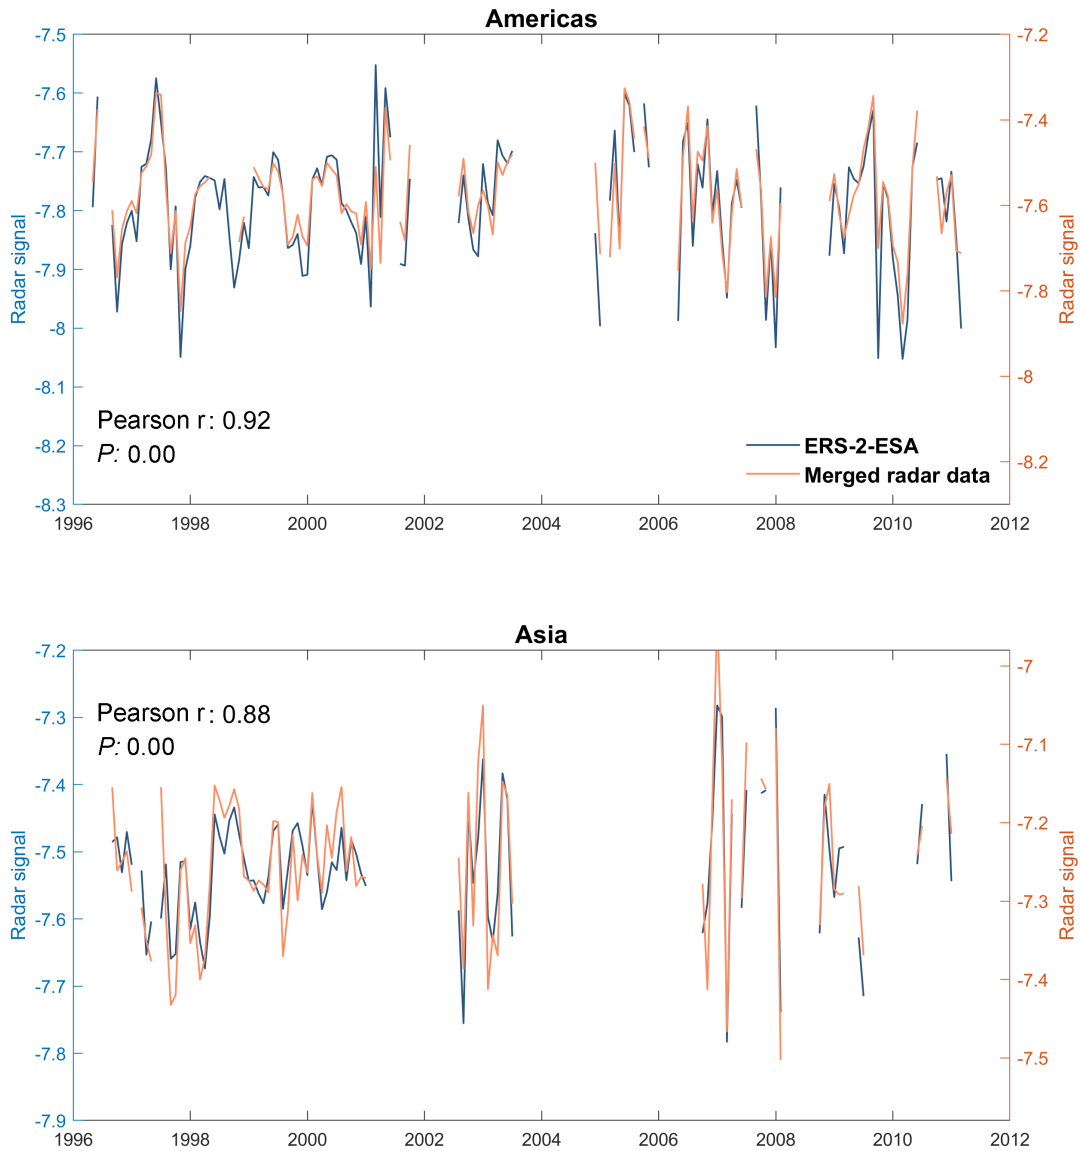

**Fig. S3. Validation of merged radar data against ERS-2-ESA data.** The orange line represents the radar data set used in the present study. It was compared with the ERS-2-ESA data set at a subset of pixels sampled by the ERS-2 satellite. The correlation between the two timeseries is high, both in the Americas and in Asia.

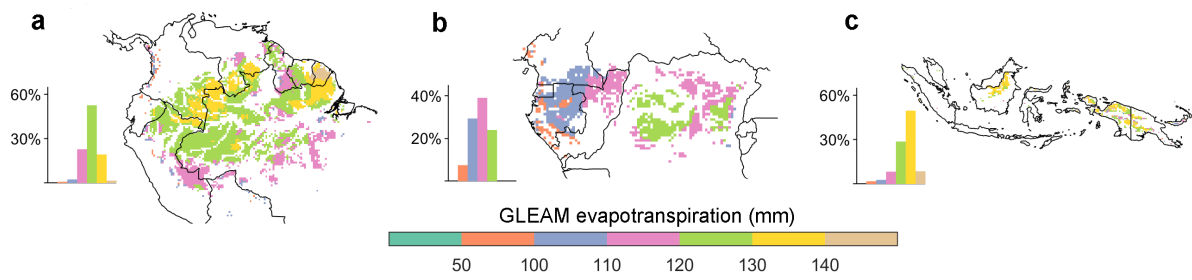

**Fig. S4. Spatial patterns of GLEAM month evapotranspiration, averaged across all months in 1992–2018.** The histograms beside each regional map show the proportion of pixels in each evapotranspiration class. The colour scheme is the same in the histograms and maps.

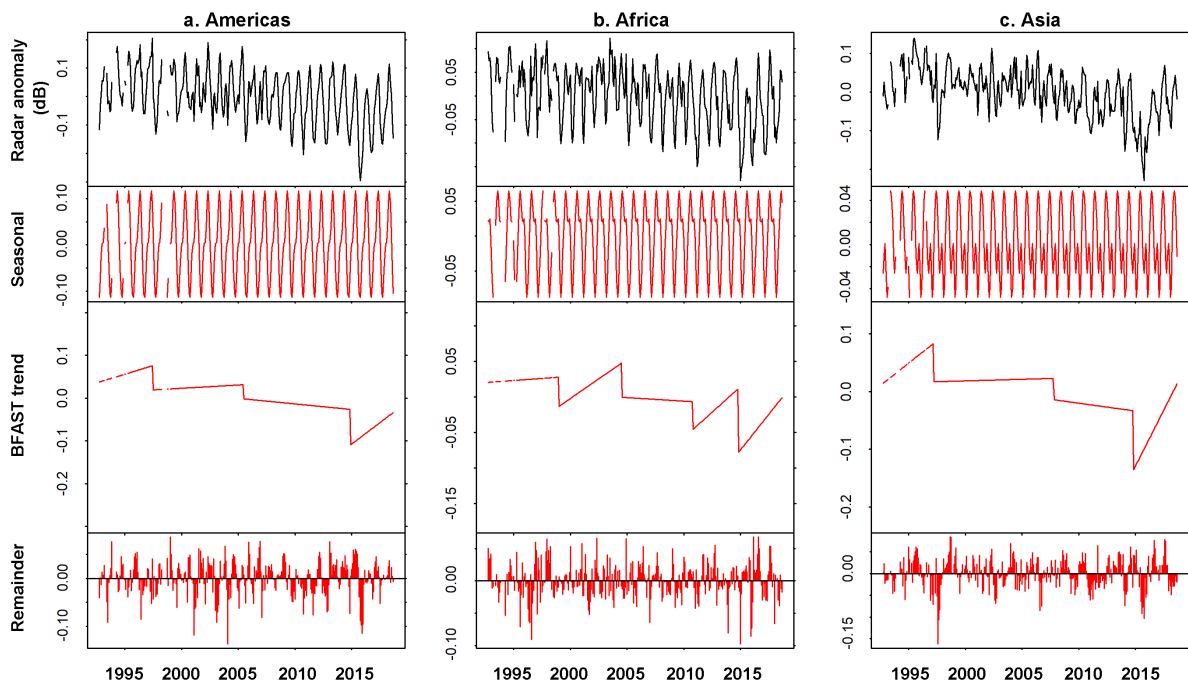

**Fig. S5. BFAST (Breaks for Additive Season and Trend algorithm) decomposition of the radar signal.** The monthly radar anomalies (averaged across all pixels within a continent) are presented in the upper panel, followed by the estimated seasonal amplitude, the “breaks” in radar signal detected by BFAST, and finally the remainder (the variation of the signal after removing the trend).

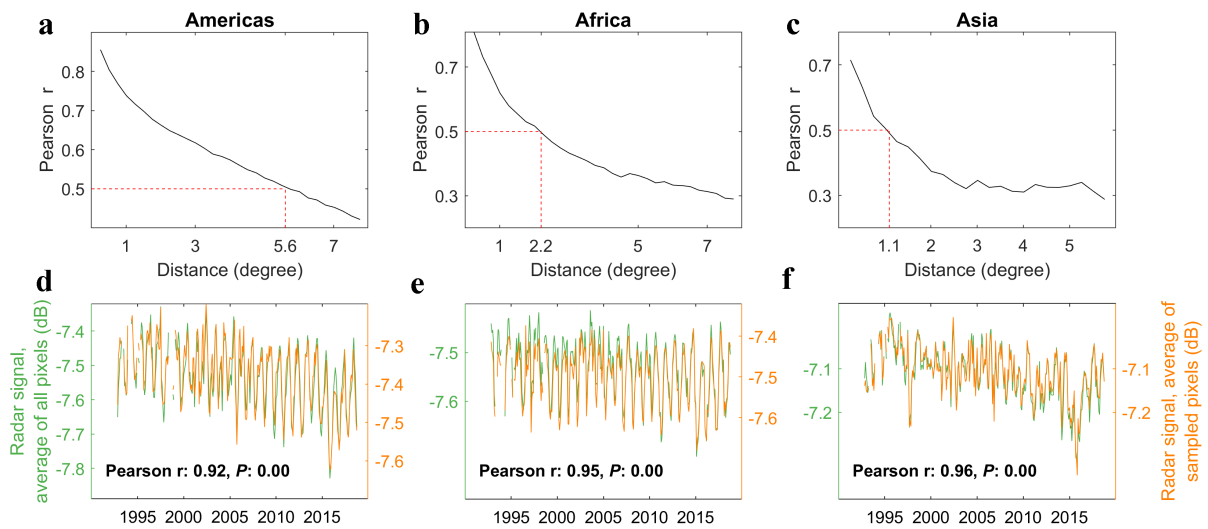

**Fig. S6. Influence of spatial autocorrelation on the radar signal trends.** (a-c) show the decrease in radar signal correlation as a function of distance between pixel pairs. The distance is calculated on the basis of the latitudes and longitudes of the pixel centers, and therefore has a unit of degree which is about 110 kilometers at the equator. A distance  $D_2$  corresponding to a Pearson  $r$  of 0.5 was identified, which was 5.6 degrees in tropical Americas, 2.2 degrees in Africa, and 1.1 degrees in Asia. (d-f) show the time series of radar signal as in Fig. 1 of the main text (in green) or calculated as average across pixels greater than the  $D_2$  distance (in orange).

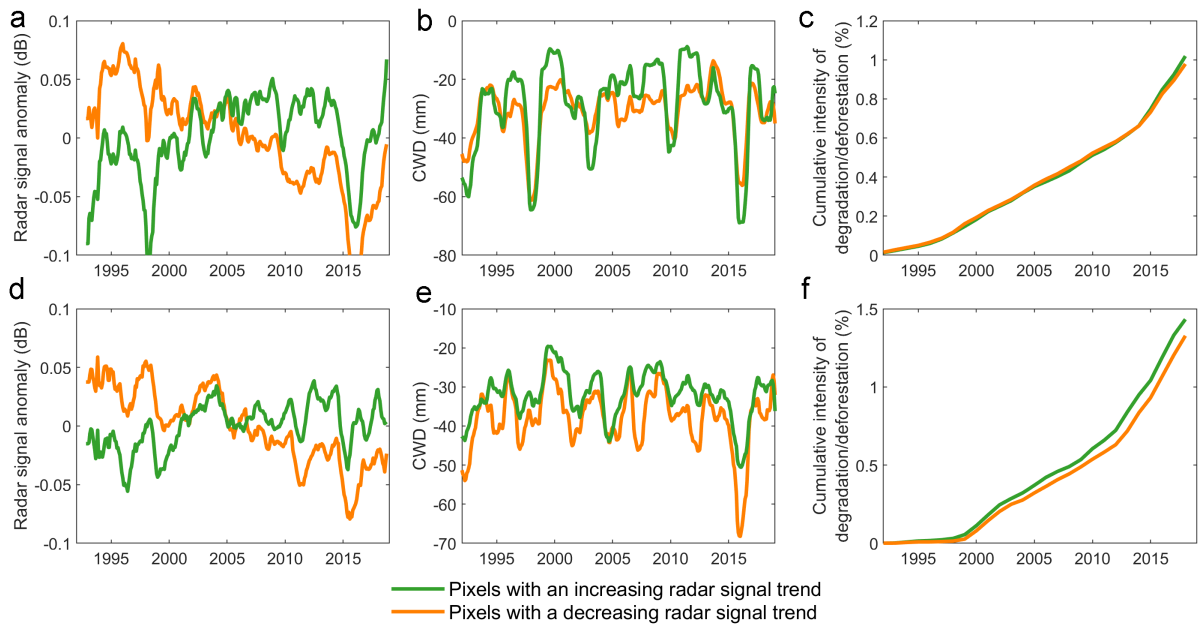

**Fig. S7. Time series of radar signal anomaly, cumulative water deficit (CWD), and cumulative forest degradation/deforestation intensity, for two types of rainforests in tropical Americas (a-c) and Africa (d-f).** Pixels with an increasing radar signal trend (colored in green), were compared to pixels with a decreasing trend (colored in orange). See Fig. 2a & 2b in the main text for the spatial distributions of the pixels. The time series shown in (a), (b), (d) and (f) are 12-month moving averages. Panels (c) and (f) show the cumulative intensity of degradation/deforestation, calculated as the cumulative area of the 30 m resolution degraded/deforested forest pixels, divided by the total area of all the radar pixels with an increasing (colored in green) or a decreasing (colored in orange) signal trend.

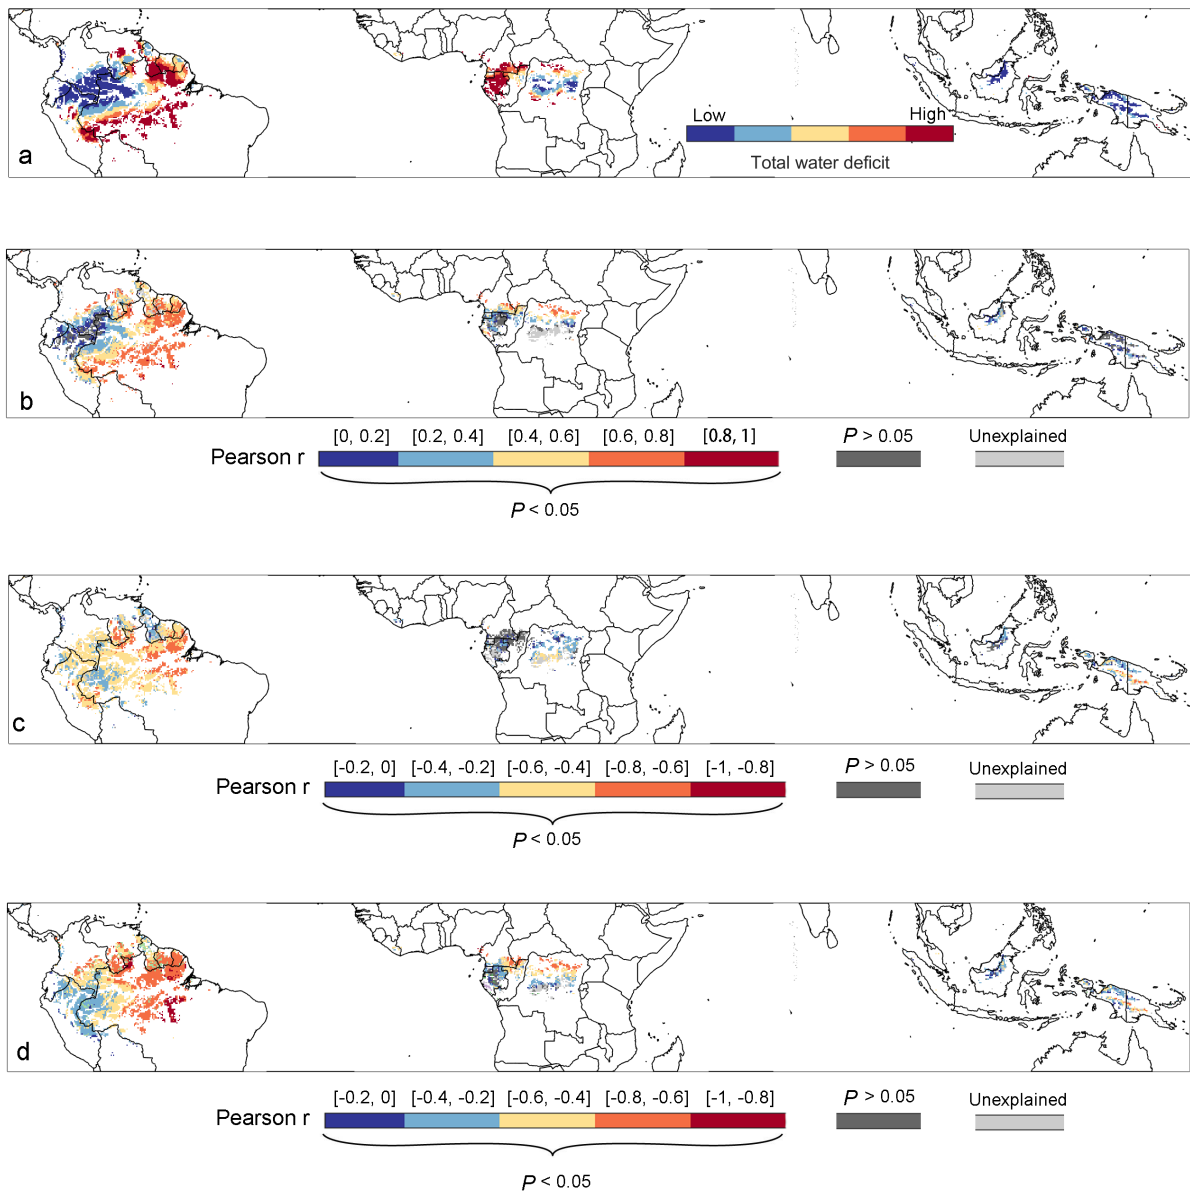

**Fig. S8. Spatial pattern of total water deficit between 1992 and 2018 (a), and correlations (Pearson  $r$ ) between radar time series and (b) cumulative water deficit, (c) MODIS daytime land surface temperature, and (d) ERA5 monthly mean air temperature. The total water deficit in (a) was calculated as the sum of all monthly cumulative water deficits between 1992 and 2018. In (b-d), regions with increased radar signals were coloured light gray ('Unexplained') and were explored independently (Fig. S7).**

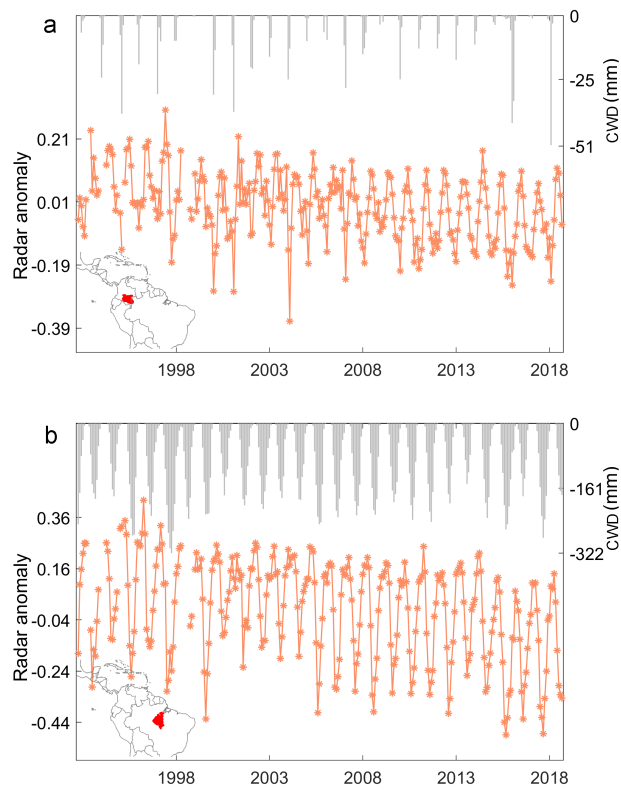

**Fig. S9. Radar signal and cumulative water deficit (CWD) in two typical forest regions. (a) Caqueta moist forests in northwestern Amazonia. (b) Tapajós-Xingu moist forests in southern Amazonia. CWD values were generally close to zero in (a), in contrast to those in (b). However, in the rare cases of water deficit in (a), the radar signal still decreased.**



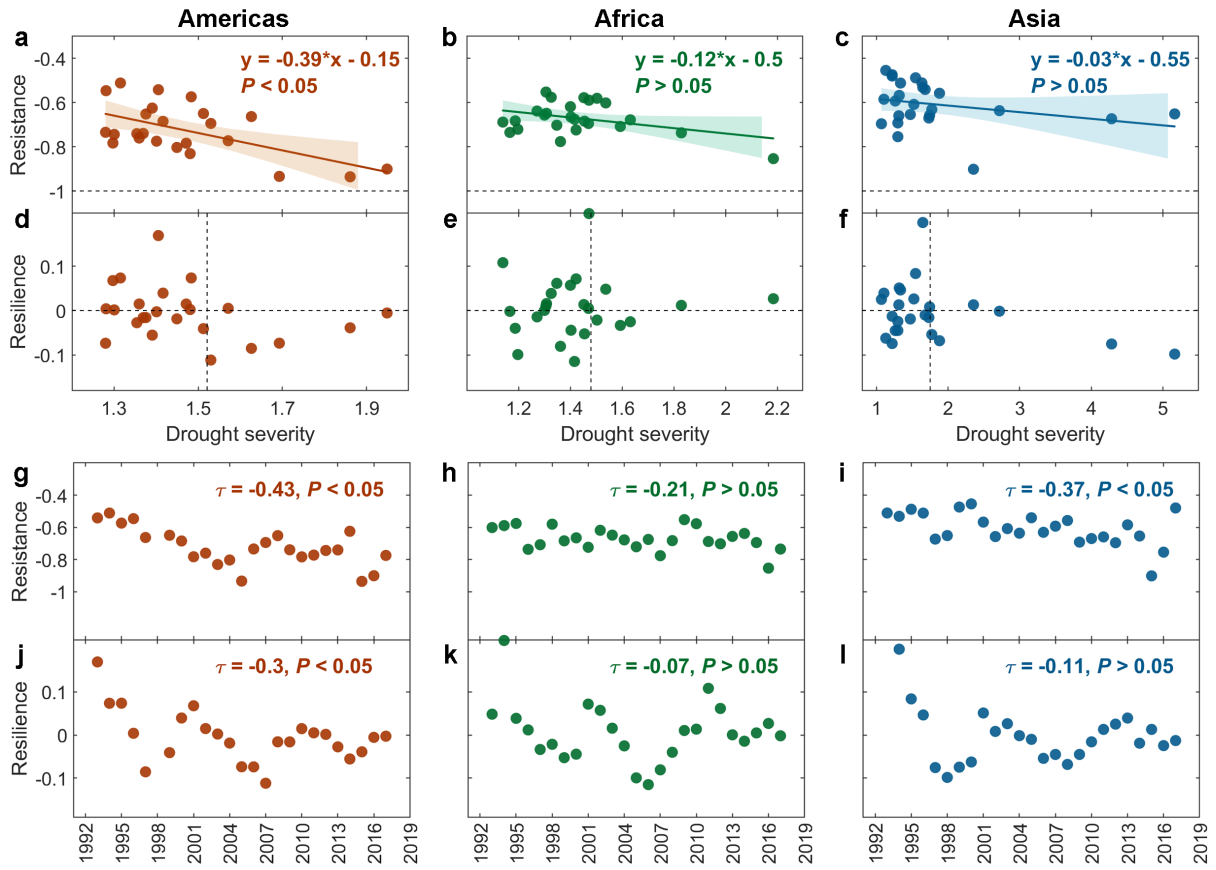

**Fig. S10. Drought resistance and resilience calculated with a three-year drought legacy length.** a-f show the drought resistance and resilience as a function of drought severity for intact tropical rainforests in three continents. g-l show the time series of drought resistance and resilience. The notations are the same as those described in the legends to Figs. 3 & 4 in the main text.

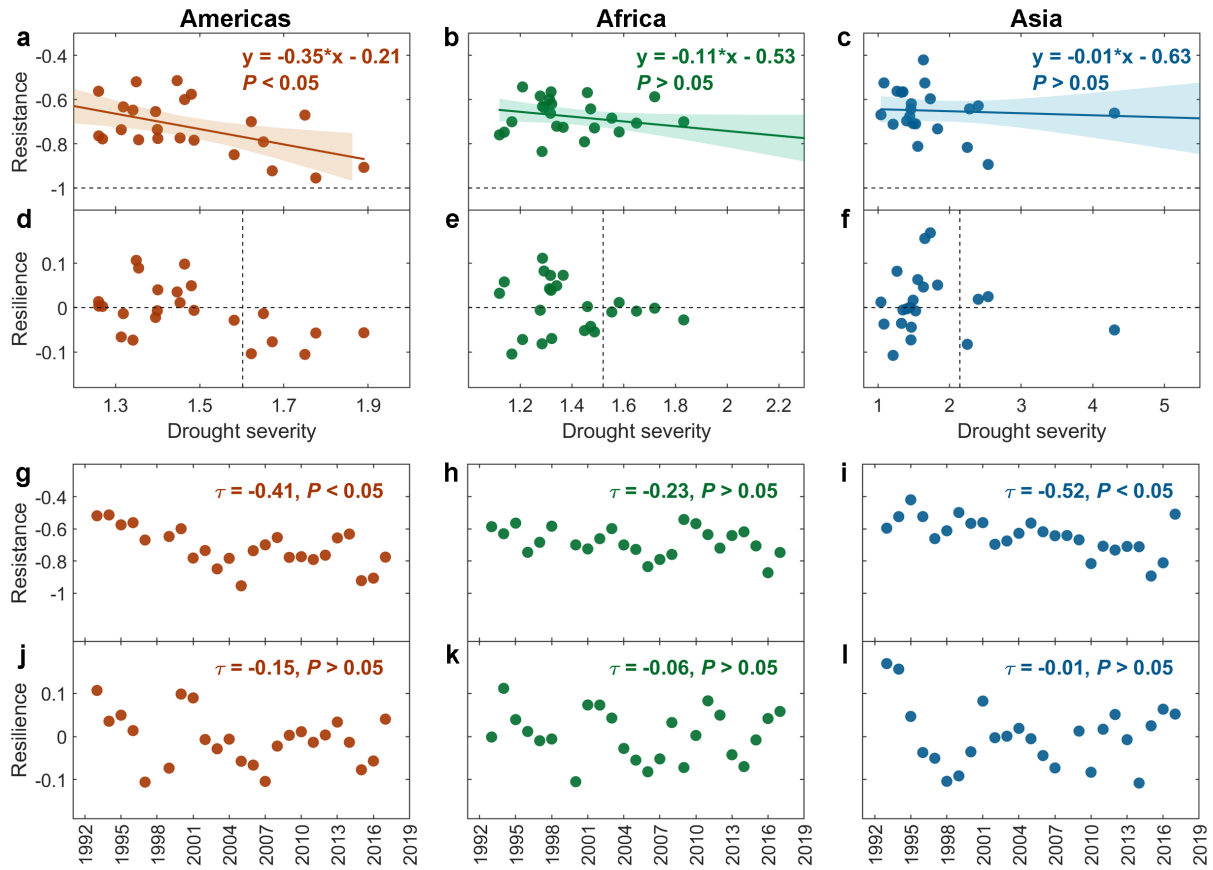

**Fig. S11. Drought resistance and resilience calculated with droughts defined by Z-score of MCWD but assuming a monthly evapotranspiration of 100 mm for calculating MCWD.** a-f show the drought resistance and resilience as a function of drought severity for intact tropical rainforests in three continents. g-l show the time series of drought resistance and resilience. The notations are the same as those described in the legends to Figs. 3 & 4 in the main text.

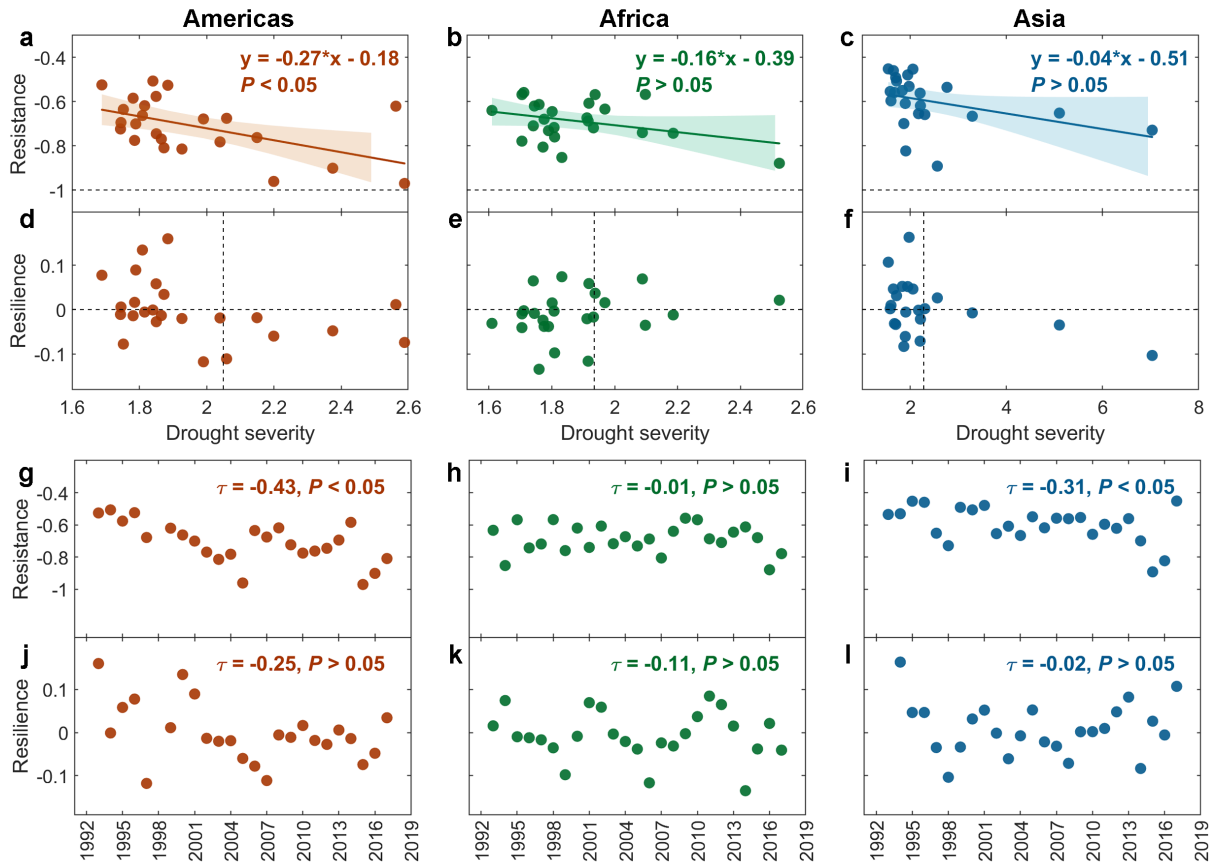

**Fig. S12. Drought resistance and resilience calculated with a threshold of -1.5 for Z-score of MCWD for defining droughts.** a-f show the drought resistance and resilience as a function of drought severity for intact tropical rainforests in three continents. g-l show the time series of drought resistance and resilience. The notations are the same as those described in the legends to Figs. 3 & 4 in the main text.

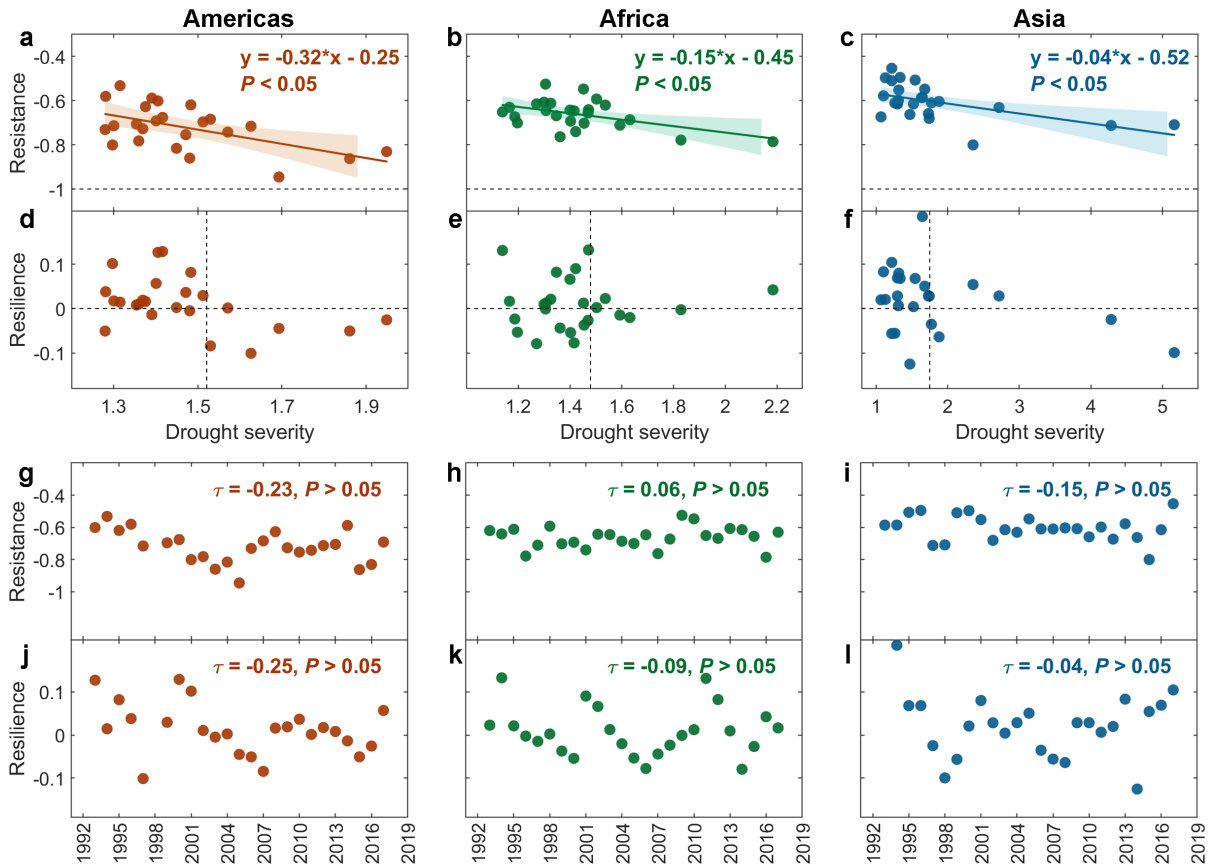

**Fig. S13. Drought resistance and resilience calculated after detrending the radar signal.**

a-f show the drought resistance and resilience as a function of drought severity for intact tropical rainforests in three continents. g-l show the time series of drought resistance and resilience. The notations are the same as those described in the legends to Figs. 3 & 4 in the main text.

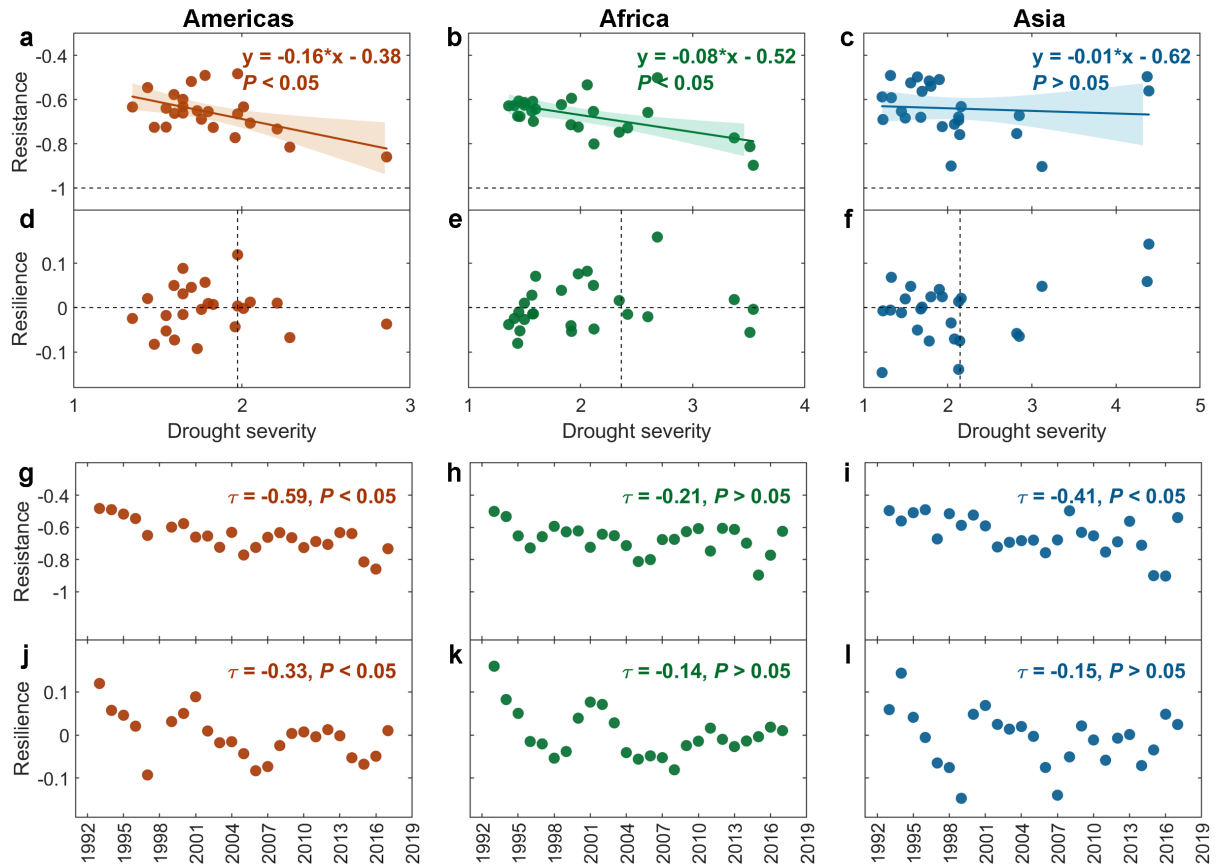

**Fig. S14. Drought resistance and resilience calculated with droughts defined by CRU scPDSI.** a-f show the drought resistance and resilience as a function of drought severity for intact tropical rainforests in three continents. g-l show the time series of drought resistance and resilience. A threshold of -1 was applied on scPDSI to define past droughts. The absolute value of scPDSI was used to indicate the drought severity. Other notations are the same as those described in the legends to Figs. 3 & 4 in the main text.

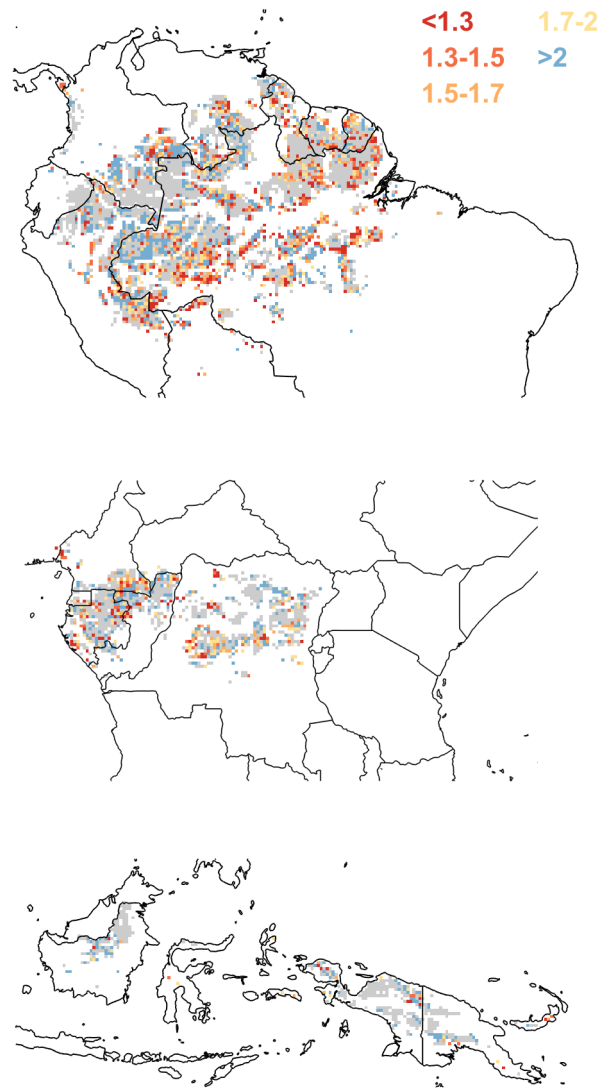

**Fig. S15. Spatial pattern of the drought severity threshold beyond which the forest cannot recover its pre-drought state.** Pixels coloured in gray are forests where such threshold was not detected. Drought severity was calculated as the absolute value of the Z-score of maximum cumulative water deficit within a year (MCWD). The drought severity threshold was such that above the threshold all estimated resilience values were negative.

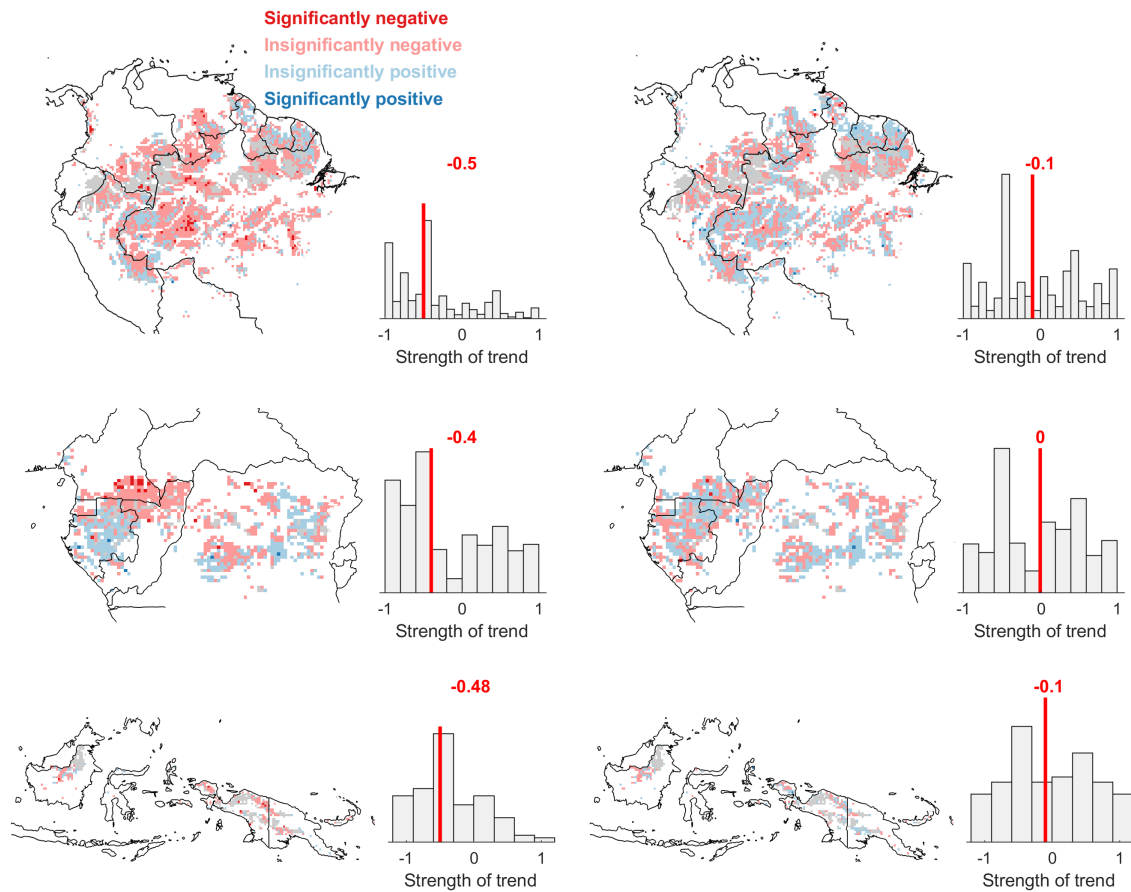

**Fig. S16. Temporal trends in drought resistance (a-c) and resilience (d-f) for intact tropical rainforests.** Trends were tested using Spearman’s rho test. Negative values (warm colours) mean decreasing trends, and positive values (cool colours) mean increasing trends, with their absolute value representing the strength of the trend. Trends with a  $P$  value  $< 0.05$  were deemed as significant. The histogram shows the distribution of trend strengths across all pixels, with the median value marked and labelled in red. Pixels coloured in gray are forests where less than two droughts occurred, so where no trend is available.

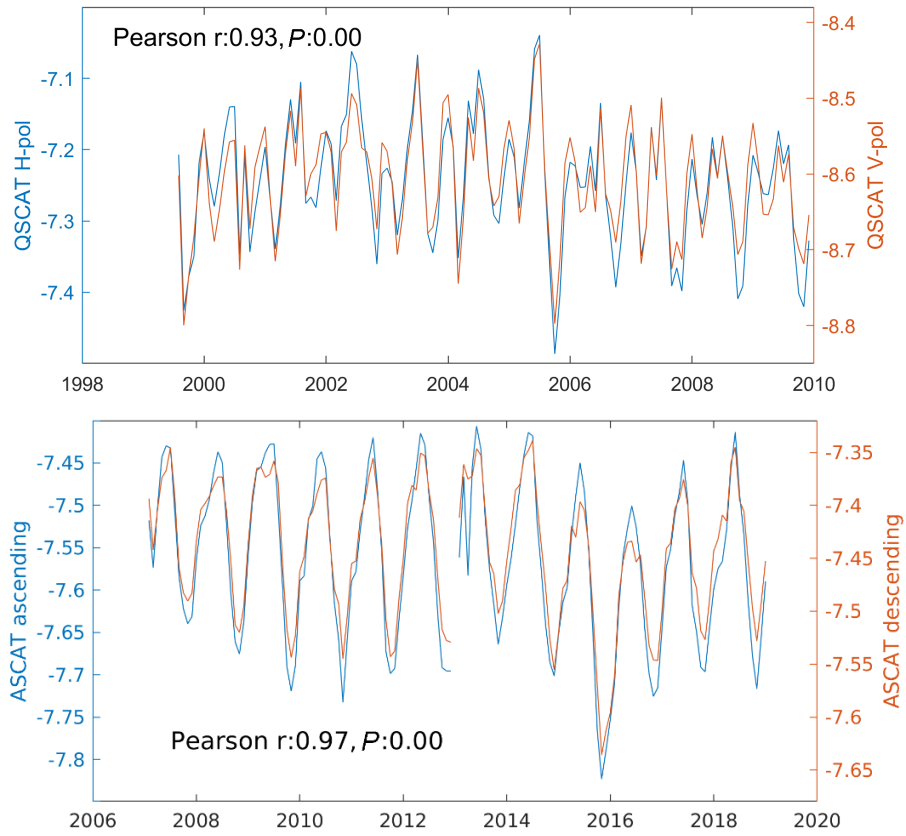

**Fig. S17. Effect of polarisation and the choice of the ascending versus descending paths on the radar signal.** (Top) Comparison of monthly mean QSCAT signals from V-polarization and H-polarization modes over Amazonian intact rainforests. (Bottom) Comparison of monthly mean ASCAT signals from ascending and descending paths over Amazonian intact rainforests.



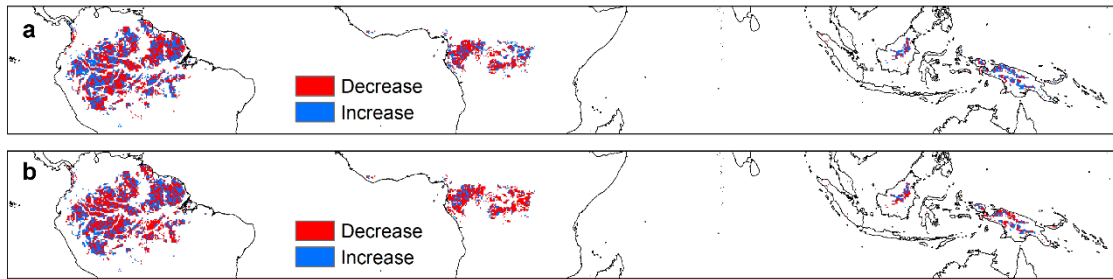

**Fig. S18.** Spatial pattern of the temporal trends in rain rate (>5 mm/hour) observed at the time of the QSCAT acquisition (**a**, 6:00 am of each day in 1999-2009) and ASCAT acquisition (**b**, 21:30 pm of each day in 2007-2018).

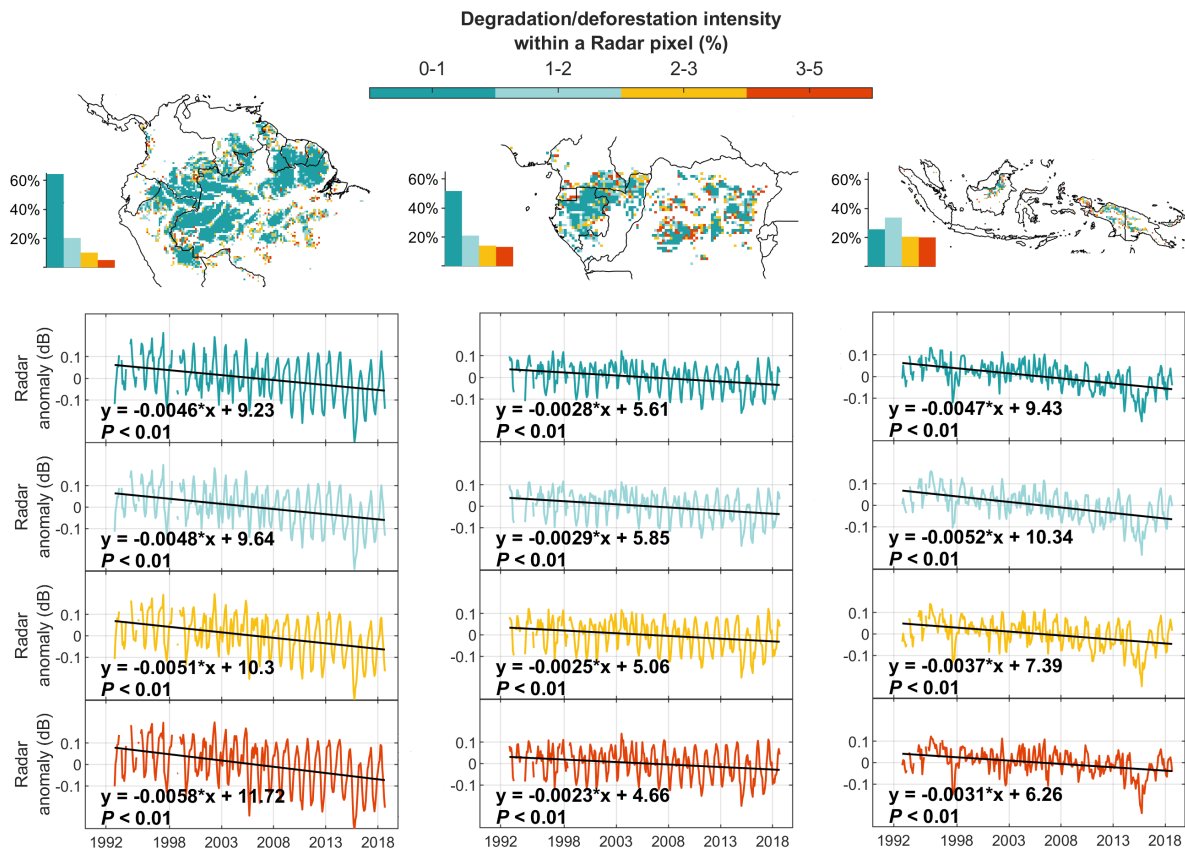

**Fig. S19. Spatial patterns and radar signals for intact tropical rainforest pixels categorized into four groups of degradation/deforestation intensity.** The shown intact tropical rainforest pixels were defined using the 2020 baseline map of undisturbed tropical forests provided by Vancutsem et al. (17, See Section 4). For each pixel, its degradation/deforestation intensity was calculated as the total area of all the 30 m forest pixels that were either degraded or deforested during 1992 -2018, divided by the radar pixel area ( $25 \times 25$  km). For each pixel group, anomalies of the averaged radar signals were plotted. A trend line was fitted to the anomalies, and the regression and  $P$  value were provided.

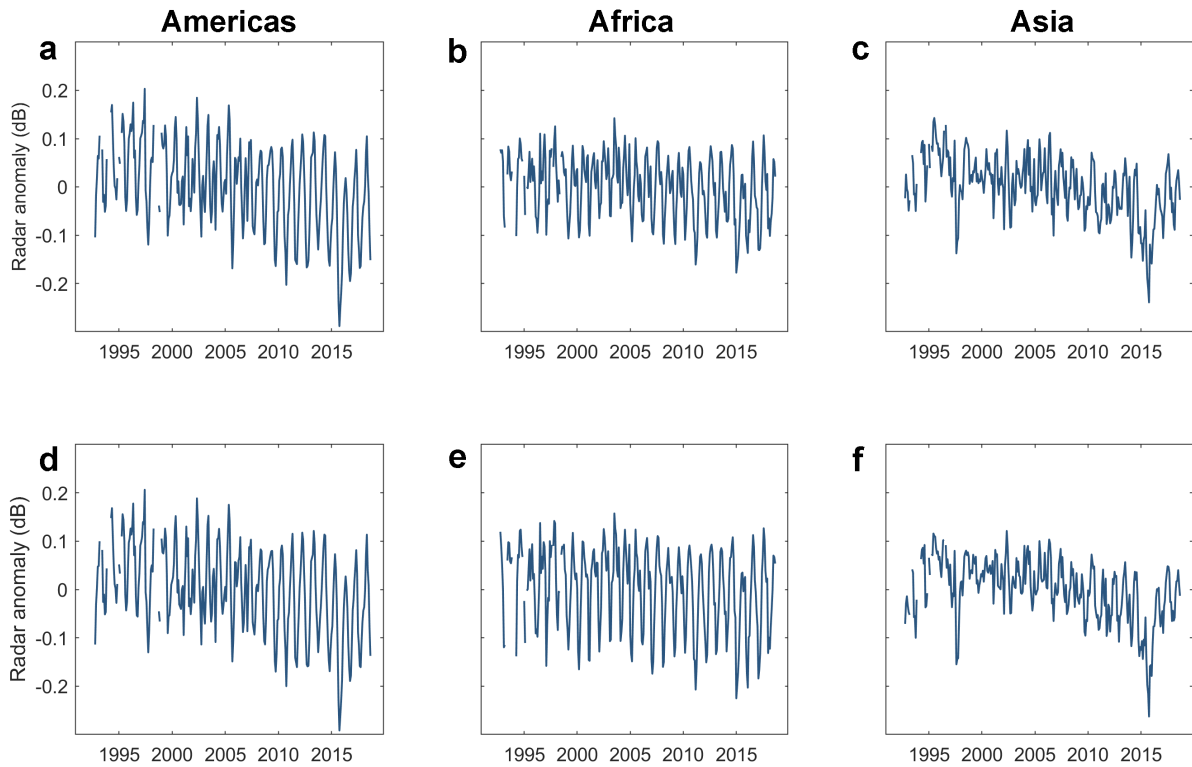

**Fig. S20. Radar signals averaged across intact rainforest pixels defined by (a-c) the Hansen forest cover change maps and (d-f) the Forest Integrity Index map.** This figure demonstrates that the results reported in Fig. 1 in the main text do not strongly depend on the definitions of intact rainforest pixels. Please see the last paragraph of Section 12 for more details on these alternative definitions of intact rainforest pixels.

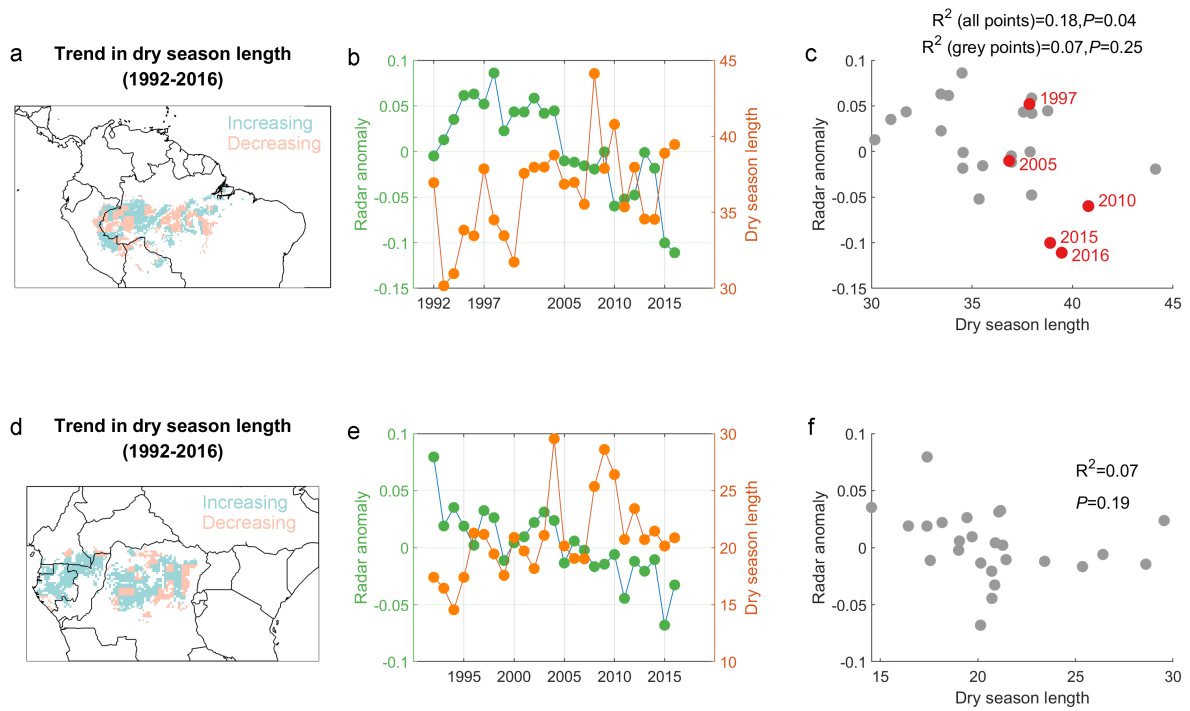

**Fig. S21. Dry season length as a function of radar signals for southern Amazonia (a-c) and central Africa (d-f).** The unit of the dry season length is pentad (5 days), and the unit of radar signal anomaly is decibel (dB). The length of the dry season was correlated with the decrease in the annual radar signal in southern Amazonia, although with a low correlation coefficient ( $R^2=0.18$ ). This effect was attributed to the increased frequency of severe droughts during the study period.

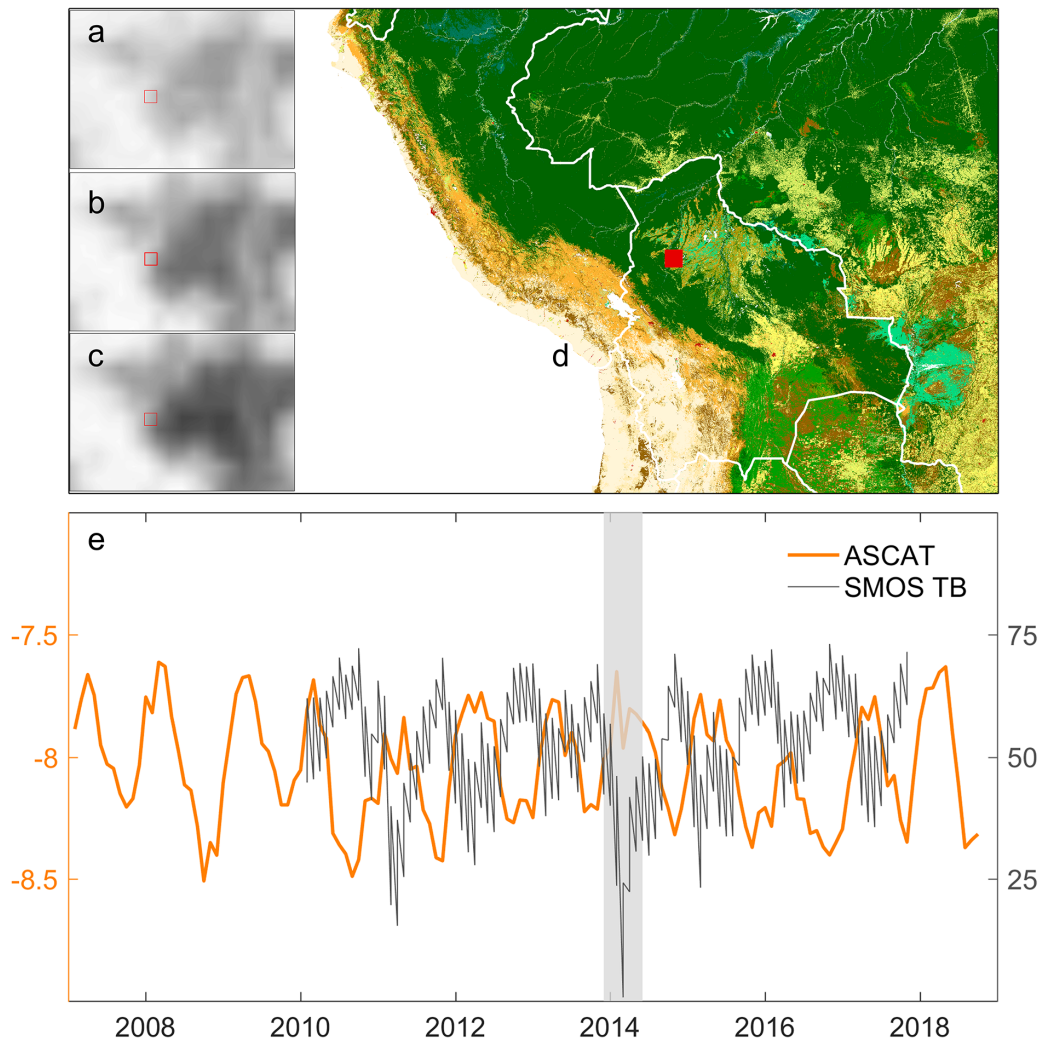

**Fig. S22. ASCAT backscatter and SMOS brightness temperature (TB) during a severe flood in February 2014 in southwestern Amazonia.** The progression of this flood was captured by SMOS brightness temperature images in (a) December 2013, (b) January 2014, and (c) February 2014. The red rectangle shows the location of a forest that was flooded (a–d). The ASCAT and SMOS TB signals of this forest were shown in (e). European Space Agency (ESA) Climate Change Initiative (CCI) land-cover map for the year 2015 ([maps.elie.ucl.ac.be/CCI/viewer/](https://maps.elie.ucl.ac.be/CCI/viewer/)) was used as background in (d).

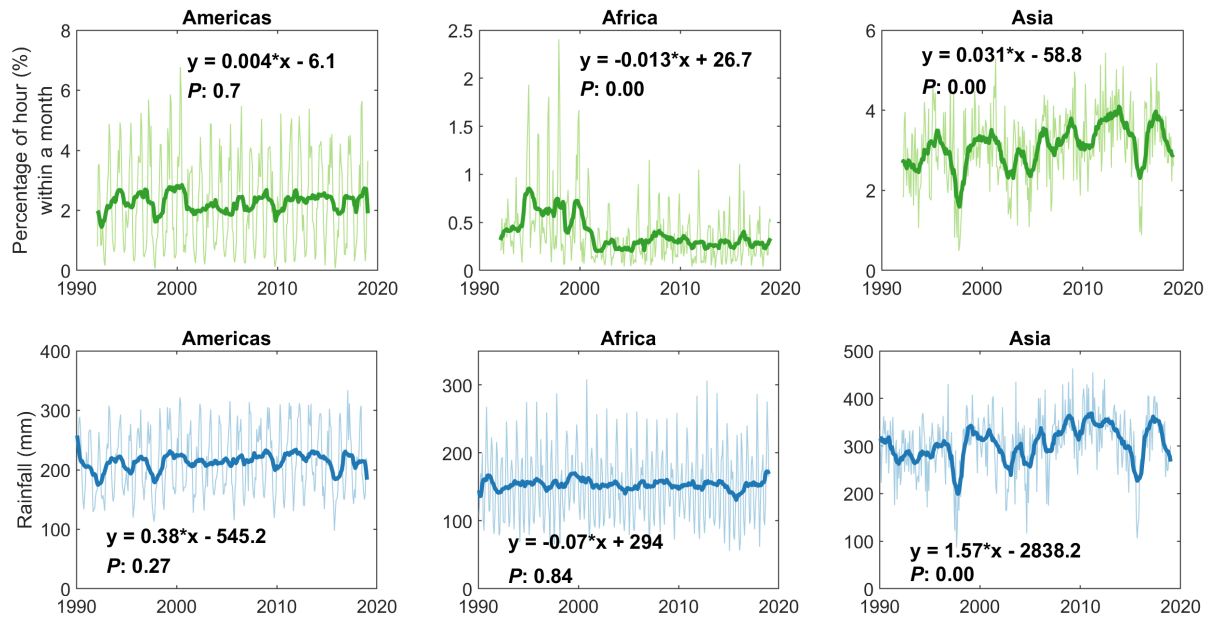

**Fig. S23. (Top row)** Dynamics of monthly leaf surface dew duration for American, African, and Asian intact tropical rainforests. Shown are the averages across all intact rainforest 25 km pixels. **(Bottom row)** Dynamics of monthly CHIRPS rainfall for American, African, and Asian intact tropical rainforests. The thin line in each panel shows the monthly rainfall or dew duration, and the thick line shows a 12-month moving average. A linear regression was fitted to the monthly rainfall or dew duration and the regression equation was labeled in each panel.

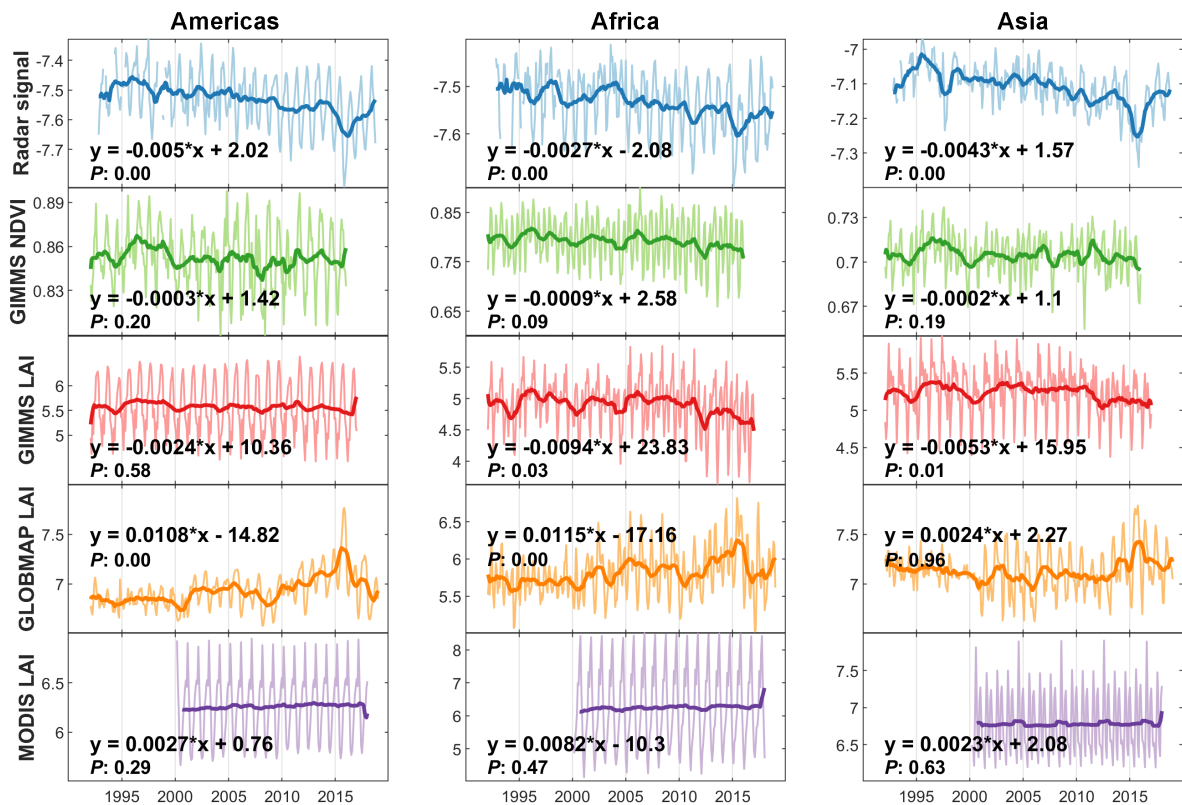

**Fig. S24. Dynamics of monthly radar signal (top row), GIMMS NDVI (second row), GIMMS LAI (third row), GLOBMAP LAI (fourth row) and MODIS LAI (bottom row) in American, African, and Asian intact tropical rainforests.** Shown are the averages across all intact rainforest 25 km pixels. In each subset, the monthly NDVI/LAI observation is shown as a thin line, on top of which a 12-month moving average is shown as a thick line. Linear regression was fitted to the monthly radar signal, NDVI or LAI, and the regression equation was labeled within each panel.

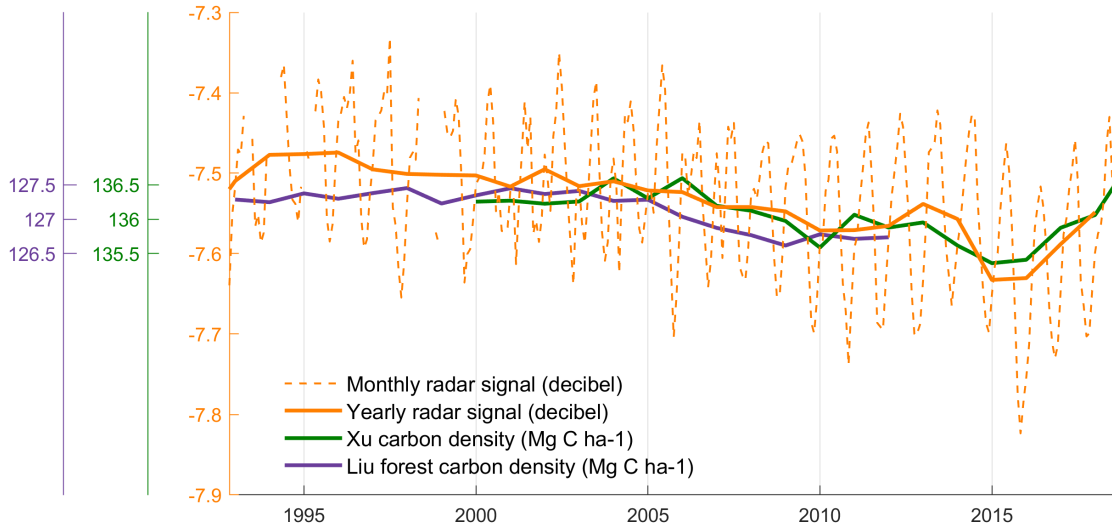

**Fig. S25. Radar signal compared with time series of forest biomass carbon for the American tropics.** Both the radar signal and forest biomass carbon shown here have been averaged across intact rainforest pixels within the American tropics. Time series of forest biomass carbon were taken from ref (54) and ref (55). The Pearson  $r$  between the yearly radar signal and Xu carbon density is 0.86 ( $P < 0.01$ ). The Pearson  $r$  between the yearly radar signal and Liu carbon density is 0.84 ( $P < 0.01$ ).



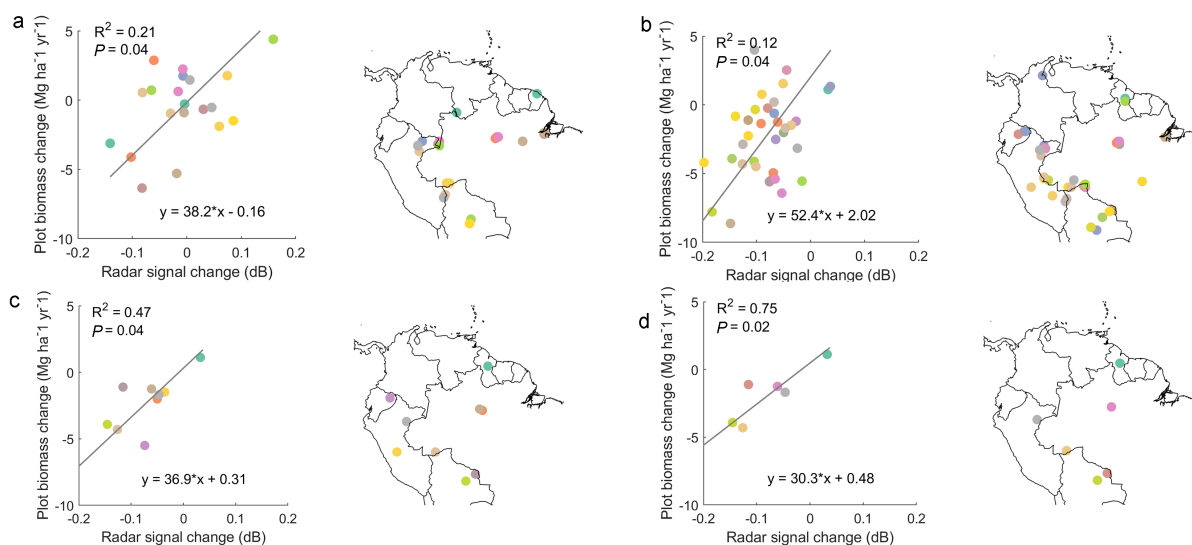

**Fig. S26. Changes in radar signal *versus* changes in plot biomass during two mega-droughts.** Significant positive correlations between radar signal changes and plot biomass changes were obtained, suggesting that the radar signals detect drought-induced biomass loss. (a) and (b) show the changes in the radar signal *versus* changes in plot biomass caused by the droughts of 2005 and 2010, respectively. (c) is similar to (b), but includes only radar pixels with at least two ground plots in the pixel footprint, and 5 km apart. (d) is similar to (c), but with a distance between plots at least 10 km. (c) and (d) attempted to solve the scale mismatch between the radar pixel (25 km) and the ground plot (~1 ha). The colours were randomly assigned to the points in each panel.

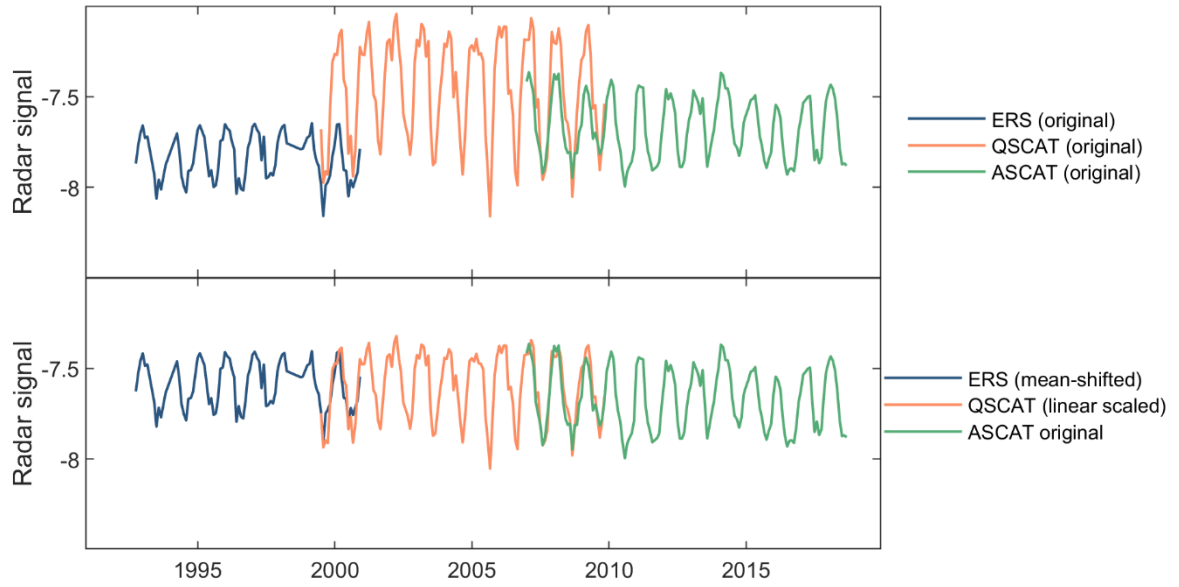

**Fig. S27. Illustration of the rescaling of radar data from different sensors.** The top panel shows the original time series prior to rescaling. The bottom panel shows the same time series but after rescaling.

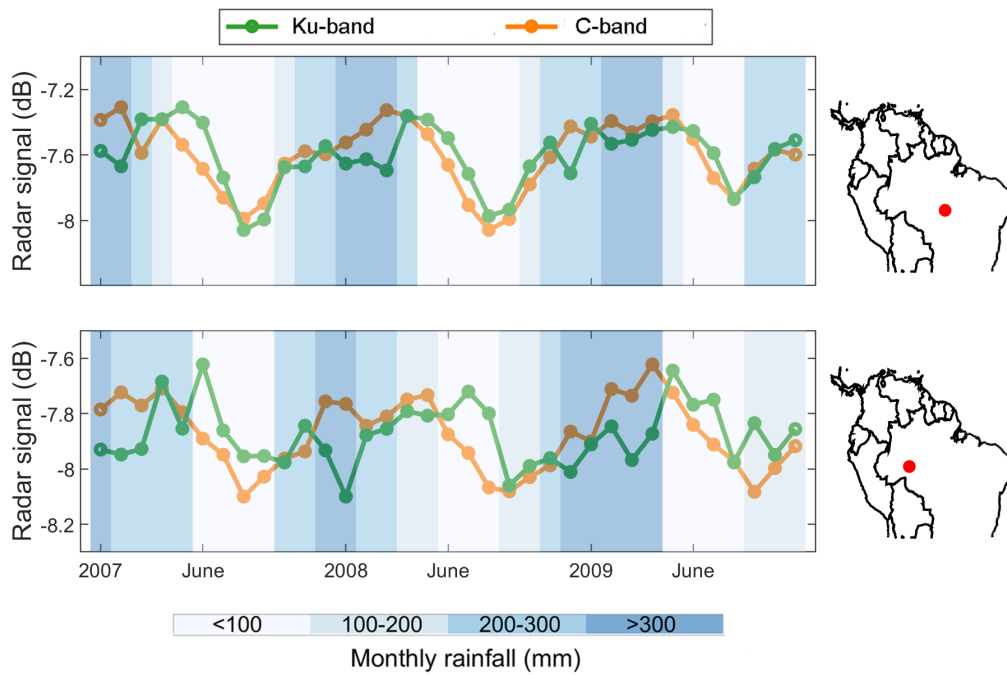

**Fig. S28. Comparisons between Ku-band (QSCAT) and C-band (ASCAT) radar signals over a 3-year overlapping period (2007-2010).** The signals are from two pixels with different annual precipitations as measured by TRMM 3B43 V7 data. Pixel locations are shown as red dots in the right panels.

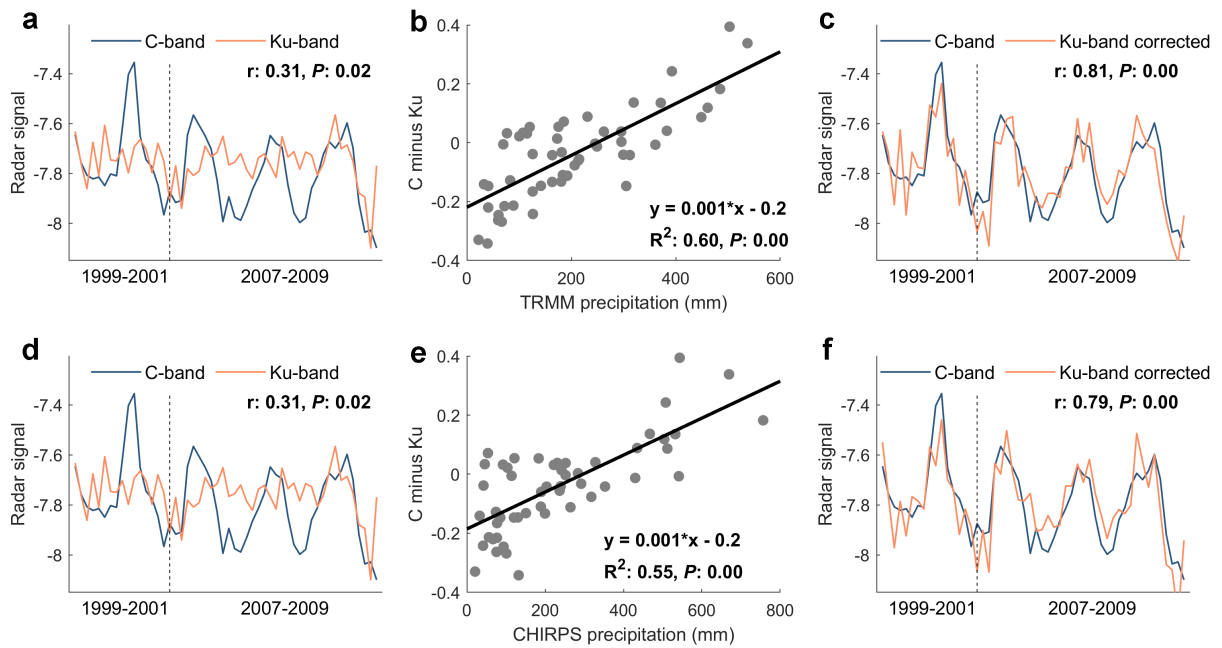

**Fig. S29. Illustration of the rainfall-assisted correction on Ku-band (QSCAT) signals. a,** C-band and Ku-band signals before correction. **b,** regression between signal differences and TRMM precipitation. **c,** C-band and Ku-band signals after correction. The vertical dotted line in **a** and **c** separates the ERS-QSCAT overlapping (1999–2001) and QSCAT-ASCAT (2007–2009) overlapping periods. **(d-f)** show the same Ku-band signal but corrected by CHIRPS rainfall.

**a**

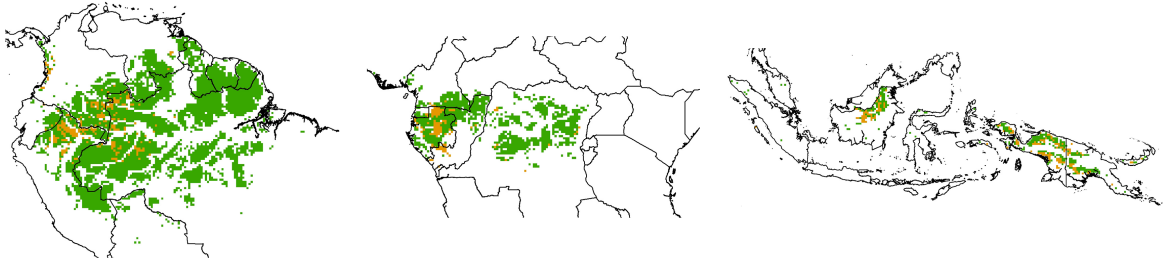

**b**

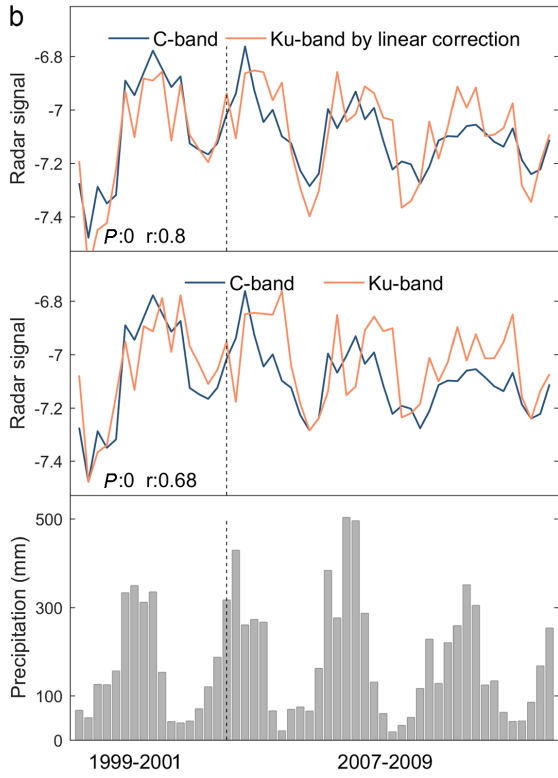

**c**

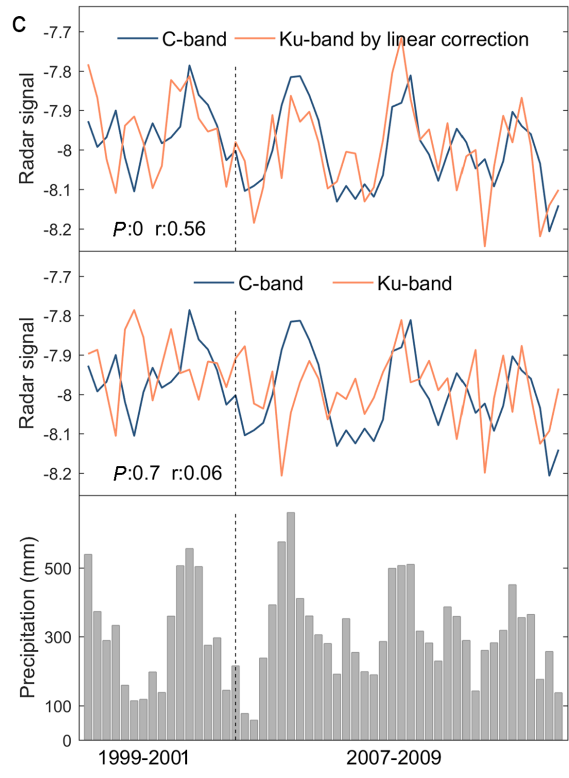

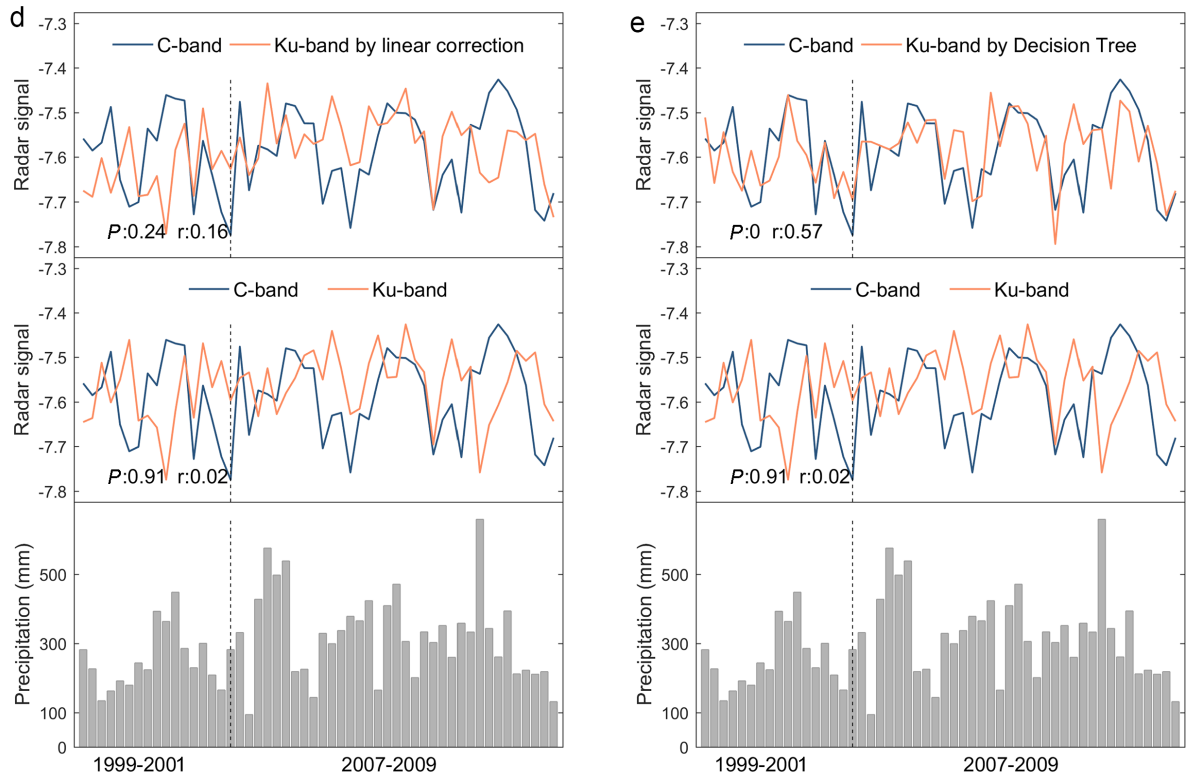

**Fig. S30. Spatial pattern and examples of the rainfall-assisted correction on Ku-band signals.** **a.** Two regions (distinguished by colour) where rainfall-assisted correction on the Ku-band signal was made using different regression techniques. In the region coloured green, linear regressions were performed between the signal differences and the precipitation (i.e., linear regression correction). In the region coloured yellow, a decision tree analysis was performed between the signal differences and the precipitation (i.e., Decision Tree regression correction). **b & c.** Two examples of the rainfall-assisted correction in the “green” region. The match between the Ku-band and C-band signals was greatly improved after the correction. **d & e.** An example of the rainfall-assisted correction in the “yellow” region. Precipitation is less seasonal in this region, so linear regression between signal differences and precipitation did not improve the match between the two signals (**d**). Decision tree analysis was finally used to model the signal differences from rainfall amounts; this improved the match (**e**).

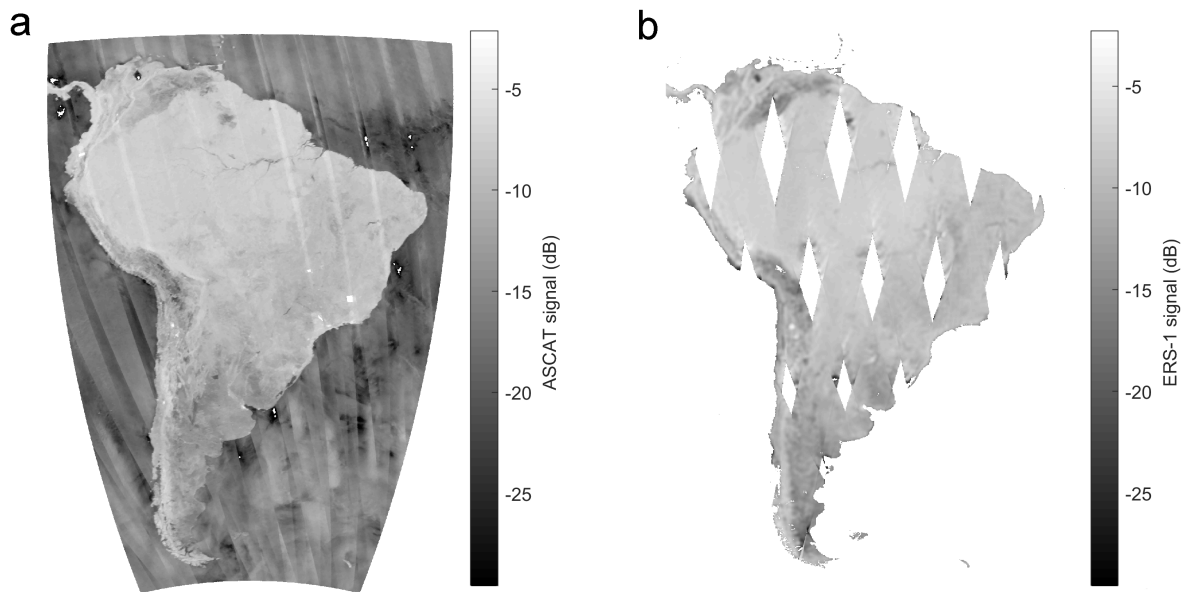

**Fig. S31.** (a) An example of ASCAT image with data strips (light gray strips in the image) acquired in May 2010, and (b) an example of a low-quality ERS-1 image acquired in March 1992.
